# Supplementary material
Source: publisher figshare collection journal article supplement (https://gsajournals.figshare.com/articles/dataset/_/19030004)
Supplement: Supplementary file 1 [file 1]

## Sheet: GP_per_trial
Table S5: predictive ability in 100 cross-validations within environment using model M3
Population	Environment	Trait	Model	Predictive Ability	Repetition
Het2	eur16	GY	A	0.477341	1
Het2	eur16	GY	A_Inb	0.489432	1
Het2	eur16	GY	AD	0.475118	1
Het2	eur16	GY	AD_Inb	0.478415	1
Het2	eur16	GY	ADI_Inb	0.481113	1
Het2	eur16	GY	AA	0.495073	1
Het2	eur16	GY	A	0.461718	2
Het2	eur16	GY	A_Inb	0.508837	2
Het2	eur16	GY	AD	0.47237	2
Het2	eur16	GY	AD_Inb	0.511569	2
Het2	eur16	GY	ADI_Inb	0.513535	2
Het2	eur16	GY	AA	0.452248	2
Het2	eur16	GY	A	0.446869	3
Het2	eur16	GY	A_Inb	0.478441	3
Het2	eur16	GY	AD	0.451651	3
Het2	eur16	GY	AD_Inb	0.477304	3
Het2	eur16	GY	ADI_Inb	0.47792	3
Het2	eur16	GY	AA	0.44229	3
Het2	eur16	GY	A	0.473945	4
Het2	eur16	GY	A_Inb	0.489391	4
Het2	eur16	GY	AD	0.475051	4
Het2	eur16	GY	AD_Inb	0.484002	4
Het2	eur16	GY	ADI_Inb	0.485749	4
Het2	eur16	GY	AA	0.439146	4
Het2	eur16	GY	A	0.466512	5
Het2	eur16	GY	A_Inb	0.494257	5
Het2	eur16	GY	AD	0.465907	5
Het2	eur16	GY	AD_Inb	0.486274	5
Het2	eur16	GY	ADI_Inb	0.490883	5
Het2	eur16	GY	AA	0.45513	5
Het2	eur16	GY	A	0.486448	6
Het2	eur16	GY	A_Inb	0.532816	6
Het2	eur16	GY	AD	0.487797	6
Het2	eur16	GY	AD_Inb	0.523655	6
Het2	eur16	GY	ADI_Inb	0.527149	6
Het2	eur16	GY	AA	0.482762	6
Het2	eur16	GY	A	0.434907	7
Het2	eur16	GY	A_Inb	0.473646	7
Het2	eur16	GY	AD	0.436566	7
Het2	eur16	GY	AD_Inb	0.468843	7
Het2	eur16	GY	ADI_Inb	0.475788	7
Het2	eur16	GY	AA	0.431037	7
Het2	eur16	GY	A	0.479648	8
Het2	eur16	GY	A_Inb	0.520145	8
Het2	eur16	GY	AD	0.48265	8
Het2	eur16	GY	AD_Inb	0.518488	8
Het2	eur16	GY	ADI_Inb	0.521002	8
Het2	eur16	GY	AA	0.466175	8
Het2	eur16	GY	A	0.398826	9
Het2	eur16	GY	A_Inb	0.432012	9
Het2	eur16	GY	AD	0.402188	9
Het2	eur16	GY	AD_Inb	0.430115	9
Het2	eur16	GY	ADI_Inb	0.432178	9
Het2	eur16	GY	AA	0.380473	9
Het2	eur16	GY	A	0.469382	10
Het2	eur16	GY	A_Inb	0.509794	10
Het2	eur16	GY	AD	0.463856	10
Het2	eur16	GY	AD_Inb	0.501773	10
Het2	eur16	GY	ADI_Inb	0.509201	10
Het2	eur16	GY	AA	0.522242	10
Het2	eur16	GY	A	0.464467	11
Het2	eur16	GY	A_Inb	0.50615	11
Het2	eur16	GY	AD	0.471069	11
Het2	eur16	GY	AD_Inb	0.504798	11
Het2	eur16	GY	ADI_Inb	0.508004	11
Het2	eur16	GY	AA	0.446649	11
Het2	eur16	GY	A	0.422025	12
Het2	eur16	GY	A_Inb	0.454171	12
Het2	eur16	GY	AD	0.423023	12
Het2	eur16	GY	AD_Inb	0.451763	12
Het2	eur16	GY	ADI_Inb	0.454062	12
Het2	eur16	GY	AA	0.44696	12
Het2	eur16	GY	A	0.452536	13
Het2	eur16	GY	A_Inb	0.48255	13
Het2	eur16	GY	AD	0.460678	13
Het2	eur16	GY	AD_Inb	0.47809	13
Het2	eur16	GY	ADI_Inb	0.481899	13
Het2	eur16	GY	AA	0.470438	13
Het2	eur16	GY	A	0.395234	14
Het2	eur16	GY	A_Inb	0.433288	14
Het2	eur16	GY	AD	0.393015	14
Het2	eur16	GY	AD_Inb	0.429481	14
Het2	eur16	GY	ADI_Inb	0.430998	14
Het2	eur16	GY	AA	0.419586	14
Het2	eur16	GY	A	0.413696	15
Het2	eur16	GY	A_Inb	0.471026	15
Het2	eur16	GY	AD	0.417464	15
Het2	eur16	GY	AD_Inb	0.469446	15
Het2	eur16	GY	ADI_Inb	0.477745	15
Het2	eur16	GY	AA	0.428184	15
Het2	eur16	GY	A	0.503812	16
Het2	eur16	GY	A_Inb	0.539929	16
Het2	eur16	GY	AD	0.507129	16
Het2	eur16	GY	AD_Inb	0.537157	16
Het2	eur16	GY	ADI_Inb	0.537066	16
Het2	eur16	GY	AA	0.479336	16
Het2	eur16	GY	A	0.451013	17
Het2	eur16	GY	A_Inb	0.479907	17
Het2	eur16	GY	AD	0.455442	17
Het2	eur16	GY	AD_Inb	0.477915	17
Het2	eur16	GY	ADI_Inb	0.480047	17
Het2	eur16	GY	AA	0.453784	17
Het2	eur16	GY	A	0.449942	18
Het2	eur16	GY	A_Inb	0.469084	18
Het2	eur16	GY	AD	0.450464	18
Het2	eur16	GY	AD_Inb	0.464649	18
Het2	eur16	GY	ADI_Inb	0.471331	18
Het2	eur16	GY	AA	0.438646	18
Het2	eur16	GY	A	0.44503	19
Het2	eur16	GY	A_Inb	0.468133	19
Het2	eur16	GY	AD	0.442834	19
Het2	eur16	GY	AD_Inb	0.461822	19
Het2	eur16	GY	ADI_Inb	0.469	19
Het2	eur16	GY	AA	0.431244	19
Het2	eur16	GY	A	0.41036	20
Het2	eur16	GY	A_Inb	0.438806	20
Het2	eur16	GY	AD	0.40579	20
Het2	eur16	GY	AD_Inb	0.435654	20
Het2	eur16	GY	ADI_Inb	0.439446	20
Het2	eur16	GY	AA	0.40715	20
Het2	eur16	GY	A	0.476053	21
Het2	eur16	GY	A_Inb	0.495415	21
Het2	eur16	GY	AD	0.483109	21
Het2	eur16	GY	AD_Inb	0.495975	21
Het2	eur16	GY	ADI_Inb	0.495735	21
Het2	eur16	GY	AA	0.482451	21
Het2	eur16	GY	A	0.409241	22
Het2	eur16	GY	A_Inb	0.454784	22
Het2	eur16	GY	AD	0.411142	22
Het2	eur16	GY	AD_Inb	0.449245	22
Het2	eur16	GY	ADI_Inb	0.452126	22
Het2	eur16	GY	AA	0.389631	22
Het2	eur16	GY	A	0.413821	23
Het2	eur16	GY	A_Inb	0.467575	23
Het2	eur16	GY	AD	0.424031	23
Het2	eur16	GY	AD_Inb	0.467557	23
Het2	eur16	GY	ADI_Inb	0.47393	23
Het2	eur16	GY	AA	0.430115	23
Het2	eur16	GY	A	0.444071	24
Het2	eur16	GY	A_Inb	0.481898	24
Het2	eur16	GY	AD	0.440655	24
Het2	eur16	GY	AD_Inb	0.475745	24
Het2	eur16	GY	ADI_Inb	0.480513	24
Het2	eur16	GY	AA	0.409957	24
Het2	eur16	GY	A	0.440426	25
Het2	eur16	GY	A_Inb	0.504861	25
Het2	eur16	GY	AD	0.449125	25
Het2	eur16	GY	AD_Inb	0.50498	25
Het2	eur16	GY	ADI_Inb	0.504984	25
Het2	eur16	GY	AA	0.440763	25
Het2	eur16	GY	A	0.462776	26
Het2	eur16	GY	A_Inb	0.518001	26
Het2	eur16	GY	AD	0.468161	26
Het2	eur16	GY	AD_Inb	0.511642	26
Het2	eur16	GY	ADI_Inb	0.514799	26
Het2	eur16	GY	AA	0.454267	26
Het2	eur16	GY	A	0.434427	27
Het2	eur16	GY	A_Inb	0.459125	27
Het2	eur16	GY	AD	0.437991	27
Het2	eur16	GY	AD_Inb	0.457713	27
Het2	eur16	GY	ADI_Inb	0.46284	27
Het2	eur16	GY	AA	0.433376	27
Het2	eur16	GY	A	0.428039	28
Het2	eur16	GY	A_Inb	0.456413	28
Het2	eur16	GY	AD	0.426837	28
Het2	eur16	GY	AD_Inb	0.449358	28
Het2	eur16	GY	ADI_Inb	0.455377	28
Het2	eur16	GY	AA	0.426144	28
Het2	eur16	GY	A	0.419413	29
Het2	eur16	GY	A_Inb	0.457518	29
Het2	eur16	GY	AD	0.424319	29
Het2	eur16	GY	AD_Inb	0.457048	29
Het2	eur16	GY	ADI_Inb	0.459578	29
Het2	eur16	GY	AA	0.432577	29
Het2	eur16	GY	A	0.416429	30
Het2	eur16	GY	A_Inb	0.455006	30
Het2	eur16	GY	AD	0.424898	30
Het2	eur16	GY	AD_Inb	0.454745	30
Het2	eur16	GY	ADI_Inb	0.457916	30
Het2	eur16	GY	AA	0.402939	30
Het2	eur16	GY	A	0.506875	31
Het2	eur16	GY	A_Inb	0.524943	31
Het2	eur16	GY	AD	0.50317	31
Het2	eur16	GY	AD_Inb	0.51474	31
Het2	eur16	GY	ADI_Inb	0.522296	31
Het2	eur16	GY	AA	0.495717	31
Het2	eur16	GY	A	0.456292	32
Het2	eur16	GY	A_Inb	0.477561	32
Het2	eur16	GY	AD	0.455516	32
Het2	eur16	GY	AD_Inb	0.471639	32
Het2	eur16	GY	ADI_Inb	0.473367	32
Het2	eur16	GY	AA	0.454883	32
Het2	eur16	GY	A	0.375948	33
Het2	eur16	GY	A_Inb	0.416969	33
Het2	eur16	GY	AD	0.384205	33
Het2	eur16	GY	AD_Inb	0.417865	33
Het2	eur16	GY	ADI_Inb	0.42156	33
Het2	eur16	GY	AA	0.413576	33
Het2	eur16	GY	A	0.434048	34
Het2	eur16	GY	A_Inb	0.484193	34
Het2	eur16	GY	AD	0.442951	34
Het2	eur16	GY	AD_Inb	0.483267	34
Het2	eur16	GY	ADI_Inb	0.486877	34
Het2	eur16	GY	AA	0.464241	34
Het2	eur16	GY	A	0.437431	35
Het2	eur16	GY	A_Inb	0.480297	35
Het2	eur16	GY	AD	0.444597	35
Het2	eur16	GY	AD_Inb	0.478553	35
Het2	eur16	GY	ADI_Inb	0.481625	35
Het2	eur16	GY	AA	0.453001	35
Het2	eur16	GY	A	0.458655	36
Het2	eur16	GY	A_Inb	0.479037	36
Het2	eur16	GY	AD	0.465614	36
Het2	eur16	GY	AD_Inb	0.478417	36
Het2	eur16	GY	ADI_Inb	0.481127	36
Het2	eur16	GY	AA	0.459732	36
Het2	eur16	GY	A	0.446249	37
Het2	eur16	GY	A_Inb	0.480613	37
Het2	eur16	GY	AD	0.456678	37
Het2	eur16	GY	AD_Inb	0.481623	37
Het2	eur16	GY	ADI_Inb	0.484767	37
Het2	eur16	GY	AA	0.431479	37
Het2	eur16	GY	A	0.395916	38
Het2	eur16	GY	A_Inb	0.451857	38
Het2	eur16	GY	AD	0.401269	38
Het2	eur16	GY	AD_Inb	0.450978	38
Het2	eur16	GY	ADI_Inb	0.456465	38
Het2	eur16	GY	AA	0.40157	38
Het2	eur16	GY	A	0.432182	39
Het2	eur16	GY	A_Inb	0.479712	39
Het2	eur16	GY	AD	0.443875	39
Het2	eur16	GY	AD_Inb	0.482174	39
Het2	eur16	GY	ADI_Inb	0.484641	39
Het2	eur16	GY	AA	0.443541	39
Het2	eur16	GY	A	0.503101	40
Het2	eur16	GY	A_Inb	0.519583	40
Het2	eur16	GY	AD	0.495209	40
Het2	eur16	GY	AD_Inb	0.507906	40
Het2	eur16	GY	ADI_Inb	0.511882	40
Het2	eur16	GY	AA	0.449568	40
Het2	eur16	GY	A	0.51172	41
Het2	eur16	GY	A_Inb	0.5378	41
Het2	eur16	GY	AD	0.518181	41
Het2	eur16	GY	AD_Inb	0.53518	41
Het2	eur16	GY	ADI_Inb	0.539984	41
Het2	eur16	GY	AA	0.497806	41
Het2	eur16	GY	A	0.377184	42
Het2	eur16	GY	A_Inb	0.417544	42
Het2	eur16	GY	AD	0.386568	42
Het2	eur16	GY	AD_Inb	0.413764	42
Het2	eur16	GY	ADI_Inb	0.420085	42
Het2	eur16	GY	AA	0.376432	42
Het2	eur16	GY	A	0.442146	43
Het2	eur16	GY	A_Inb	0.477341	43
Het2	eur16	GY	AD	0.438893	43
Het2	eur16	GY	AD_Inb	0.472162	43
Het2	eur16	GY	ADI_Inb	0.478035	43
Het2	eur16	GY	AA	0.432968	43
Het2	eur16	GY	A	0.387095	44
Het2	eur16	GY	A_Inb	0.457415	44
Het2	eur16	GY	AD	0.403681	44
Het2	eur16	GY	AD_Inb	0.460684	44
Het2	eur16	GY	ADI_Inb	0.462622	44
Het2	eur16	GY	AA	0.392648	44
Het2	eur16	GY	A	0.481883	45
Het2	eur16	GY	A_Inb	0.489157	45
Het2	eur16	GY	AD	0.479223	45
Het2	eur16	GY	AD_Inb	0.485617	45
Het2	eur16	GY	ADI_Inb	0.488431	45
Het2	eur16	GY	AA	0.478889	45
Het2	eur16	GY	A	0.507932	46
Het2	eur16	GY	A_Inb	0.519039	46
Het2	eur16	GY	AD	0.504436	46
Het2	eur16	GY	AD_Inb	0.512435	46
Het2	eur16	GY	ADI_Inb	0.518512	46
Het2	eur16	GY	AA	0.526264	46
Het2	eur16	GY	A	0.46885	47
Het2	eur16	GY	A_Inb	0.512028	47
Het2	eur16	GY	AD	0.475419	47
Het2	eur16	GY	AD_Inb	0.506048	47
Het2	eur16	GY	ADI_Inb	0.510835	47
Het2	eur16	GY	AA	0.467669	47
Het2	eur16	GY	A	0.475431	48
Het2	eur16	GY	A_Inb	0.511453	48
Het2	eur16	GY	AD	0.478157	48
Het2	eur16	GY	AD_Inb	0.503409	48
Het2	eur16	GY	ADI_Inb	0.507445	48
Het2	eur16	GY	AA	0.462634	48
Het2	eur16	GY	A	0.391797	49
Het2	eur16	GY	A_Inb	0.42587	49
Het2	eur16	GY	AD	0.403197	49
Het2	eur16	GY	AD_Inb	0.428526	49
Het2	eur16	GY	ADI_Inb	0.432632	49
Het2	eur16	GY	AA	0.387162	49
Het2	eur16	GY	A	0.399626	50
Het2	eur16	GY	A_Inb	0.451073	50
Het2	eur16	GY	AD	0.409563	50
Het2	eur16	GY	AD_Inb	0.451413	50
Het2	eur16	GY	ADI_Inb	0.455873	50
Het2	eur16	GY	AA	0.397007	50
Het2	eur16	GY	A	0.435343	51
Het2	eur16	GY	A_Inb	0.465161	51
Het2	eur16	GY	AD	0.439878	51
Het2	eur16	GY	AD_Inb	0.465773	51
Het2	eur16	GY	ADI_Inb	0.4716	51
Het2	eur16	GY	AA	0.464821	51
Het2	eur16	GY	A	0.424131	52
Het2	eur16	GY	A_Inb	0.472997	52
Het2	eur16	GY	AD	0.435372	52
Het2	eur16	GY	AD_Inb	0.475753	52
Het2	eur16	GY	ADI_Inb	0.482633	52
Het2	eur16	GY	AA	0.440672	52
Het2	eur16	GY	A	0.408023	53
Het2	eur16	GY	A_Inb	0.462115	53
Het2	eur16	GY	AD	0.407599	53
Het2	eur16	GY	AD_Inb	0.458678	53
Het2	eur16	GY	ADI_Inb	0.464501	53
Het2	eur16	GY	AA	0.406051	53
Het2	eur16	GY	A	0.442607	54
Het2	eur16	GY	A_Inb	0.489466	54
Het2	eur16	GY	AD	0.450994	54
Het2	eur16	GY	AD_Inb	0.491501	54
Het2	eur16	GY	ADI_Inb	0.494965	54
Het2	eur16	GY	AA	0.447073	54
Het2	eur16	GY	A	0.508985	55
Het2	eur16	GY	A_Inb	0.534553	55
Het2	eur16	GY	AD	0.510215	55
Het2	eur16	GY	AD_Inb	0.5307	55
Het2	eur16	GY	ADI_Inb	0.533631	55
Het2	eur16	GY	AA	0.492657	55
Het2	eur16	GY	A	0.379954	56
Het2	eur16	GY	A_Inb	0.407472	56
Het2	eur16	GY	AD	0.38008	56
Het2	eur16	GY	AD_Inb	0.403118	56
Het2	eur16	GY	ADI_Inb	0.409286	56
Het2	eur16	GY	AA	0.367065	56
Het2	eur16	GY	A	0.400075	57
Het2	eur16	GY	A_Inb	0.452662	57
Het2	eur16	GY	AD	0.414733	57
Het2	eur16	GY	AD_Inb	0.455128	57
Het2	eur16	GY	ADI_Inb	0.455387	57
Het2	eur16	GY	AA	0.356577	57
Het2	eur16	GY	A	0.38356	58
Het2	eur16	GY	A_Inb	0.460948	58
Het2	eur16	GY	AD	0.385394	58
Het2	eur16	GY	AD_Inb	0.456152	58
Het2	eur16	GY	ADI_Inb	0.462949	58
Het2	eur16	GY	AA	0.365483	58
Het2	eur16	GY	A	0.405774	59
Het2	eur16	GY	A_Inb	0.462466	59
Het2	eur16	GY	AD	0.404907	59
Het2	eur16	GY	AD_Inb	0.457196	59
Het2	eur16	GY	ADI_Inb	0.464074	59
Het2	eur16	GY	AA	0.420026	59
Het2	eur16	GY	A	0.455934	60
Het2	eur16	GY	A_Inb	0.479199	60
Het2	eur16	GY	AD	0.455008	60
Het2	eur16	GY	AD_Inb	0.475872	60
Het2	eur16	GY	ADI_Inb	0.483648	60
Het2	eur16	GY	AA	0.426268	60
Het2	eur16	GY	A	0.476222	61
Het2	eur16	GY	A_Inb	0.511068	61
Het2	eur16	GY	AD	0.480747	61
Het2	eur16	GY	AD_Inb	0.510565	61
Het2	eur16	GY	ADI_Inb	0.516905	61
Het2	eur16	GY	AA	0.513519	61
Het2	eur16	GY	A	0.463894	62
Het2	eur16	GY	A_Inb	0.49658	62
Het2	eur16	GY	AD	0.46088	62
Het2	eur16	GY	AD_Inb	0.488422	62
Het2	eur16	GY	ADI_Inb	0.496005	62
Het2	eur16	GY	AA	0.470273	62
Het2	eur16	GY	A	0.436817	63
Het2	eur16	GY	A_Inb	0.485687	63
Het2	eur16	GY	AD	0.446792	63
Het2	eur16	GY	AD_Inb	0.484437	63
Het2	eur16	GY	ADI_Inb	0.488805	63
Het2	eur16	GY	AA	0.426602	63
Het2	eur16	GY	A	0.474943	64
Het2	eur16	GY	A_Inb	0.516313	64
Het2	eur16	GY	AD	0.475685	64
Het2	eur16	GY	AD_Inb	0.510052	64
Het2	eur16	GY	ADI_Inb	0.517481	64
Het2	eur16	GY	AA	0.485841	64
Het2	eur16	GY	A	0.461918	65
Het2	eur16	GY	A_Inb	0.498468	65
Het2	eur16	GY	AD	0.456861	65
Het2	eur16	GY	AD_Inb	0.493844	65
Het2	eur16	GY	ADI_Inb	0.49781	65
Het2	eur16	GY	AA	0.483043	65
Het2	eur16	GY	A	0.488933	66
Het2	eur16	GY	A_Inb	0.515057	66
Het2	eur16	GY	AD	0.48455	66
Het2	eur16	GY	AD_Inb	0.504964	66
Het2	eur16	GY	ADI_Inb	0.510219	66
Het2	eur16	GY	AA	0.497723	66
Het2	eur16	GY	A	0.420768	67
Het2	eur16	GY	A_Inb	0.458114	67
Het2	eur16	GY	AD	0.414638	67
Het2	eur16	GY	AD_Inb	0.453342	67
Het2	eur16	GY	ADI_Inb	0.455567	67
Het2	eur16	GY	AA	0.418965	67
Het2	eur16	GY	A	0.459817	68
Het2	eur16	GY	A_Inb	0.508812	68
Het2	eur16	GY	AD	0.46635	68
Het2	eur16	GY	AD_Inb	0.505163	68
Het2	eur16	GY	ADI_Inb	0.514014	68
Het2	eur16	GY	AA	0.489373	68
Het2	eur16	GY	A	0.465451	69
Het2	eur16	GY	A_Inb	0.500035	69
Het2	eur16	GY	AD	0.466009	69
Het2	eur16	GY	AD_Inb	0.490426	69
Het2	eur16	GY	ADI_Inb	0.496886	69
Het2	eur16	GY	AA	0.432665	69
Het2	eur16	GY	A	0.404015	70
Het2	eur16	GY	A_Inb	0.440939	70
Het2	eur16	GY	AD	0.40313	70
Het2	eur16	GY	AD_Inb	0.439325	70
Het2	eur16	GY	ADI_Inb	0.440821	70
Het2	eur16	GY	AA	0.419842	70
Het2	eur16	GY	A	0.449338	71
Het2	eur16	GY	A_Inb	0.503737	71
Het2	eur16	GY	AD	0.454433	71
Het2	eur16	GY	AD_Inb	0.502252	71
Het2	eur16	GY	ADI_Inb	0.506849	71
Het2	eur16	GY	AA	0.468684	71
Het2	eur16	GY	A	0.496591	72
Het2	eur16	GY	A_Inb	0.524693	72
Het2	eur16	GY	AD	0.491681	72
Het2	eur16	GY	AD_Inb	0.514815	72
Het2	eur16	GY	ADI_Inb	0.522494	72
Het2	eur16	GY	AA	0.486801	72
Het2	eur16	GY	A	0.497093	73
Het2	eur16	GY	A_Inb	0.526432	73
Het2	eur16	GY	AD	0.500156	73
Het2	eur16	GY	AD_Inb	0.523969	73
Het2	eur16	GY	ADI_Inb	0.527377	73
Het2	eur16	GY	AA	0.481479	73
Het2	eur16	GY	A	0.442793	74
Het2	eur16	GY	A_Inb	0.487074	74
Het2	eur16	GY	AD	0.442594	74
Het2	eur16	GY	AD_Inb	0.481581	74
Het2	eur16	GY	ADI_Inb	0.485571	74
Het2	eur16	GY	AA	0.423269	74
Het2	eur16	GY	A	0.436337	75
Het2	eur16	GY	A_Inb	0.488506	75
Het2	eur16	GY	AD	0.428797	75
Het2	eur16	GY	AD_Inb	0.47798	75
Het2	eur16	GY	ADI_Inb	0.485721	75
Het2	eur16	GY	AA	0.393536	75
Het2	eur16	GY	A	0.450075	76
Het2	eur16	GY	A_Inb	0.487876	76
Het2	eur16	GY	AD	0.457675	76
Het2	eur16	GY	AD_Inb	0.48693	76
Het2	eur16	GY	ADI_Inb	0.490397	76
Het2	eur16	GY	AA	0.427796	76
Het2	eur16	GY	A	0.436447	77
Het2	eur16	GY	A_Inb	0.47899	77
Het2	eur16	GY	AD	0.448332	77
Het2	eur16	GY	AD_Inb	0.484041	77
Het2	eur16	GY	ADI_Inb	0.482962	77
Het2	eur16	GY	AA	0.403436	77
Het2	eur16	GY	A	0.448547	78
Het2	eur16	GY	A_Inb	0.49285	78
Het2	eur16	GY	AD	0.449546	78
Het2	eur16	GY	AD_Inb	0.491667	78
Het2	eur16	GY	ADI_Inb	0.496661	78
Het2	eur16	GY	AA	0.443166	78
Het2	eur16	GY	A	0.459427	79
Het2	eur16	GY	A_Inb	0.482785	79
Het2	eur16	GY	AD	0.468683	79
Het2	eur16	GY	AD_Inb	0.483037	79
Het2	eur16	GY	ADI_Inb	0.483834	79
Het2	eur16	GY	AA	0.440763	79
Het2	eur16	GY	A	0.445054	80
Het2	eur16	GY	A_Inb	0.471174	80
Het2	eur16	GY	AD	0.450339	80
Het2	eur16	GY	AD_Inb	0.46915	80
Het2	eur16	GY	ADI_Inb	0.468766	80
Het2	eur16	GY	AA	0.430114	80
Het2	eur16	GY	A	0.479619	81
Het2	eur16	GY	A_Inb	0.494942	81
Het2	eur16	GY	AD	0.479856	81
Het2	eur16	GY	AD_Inb	0.492997	81
Het2	eur16	GY	ADI_Inb	0.495512	81
Het2	eur16	GY	AA	0.441448	81
Het2	eur16	GY	A	0.487116	82
Het2	eur16	GY	A_Inb	0.505726	82
Het2	eur16	GY	AD	0.491473	82
Het2	eur16	GY	AD_Inb	0.503687	82
Het2	eur16	GY	ADI_Inb	0.505273	82
Het2	eur16	GY	AA	0.484962	82
Het2	eur16	GY	A	0.39958	83
Het2	eur16	GY	A_Inb	0.433102	83
Het2	eur16	GY	AD	0.396642	83
Het2	eur16	GY	AD_Inb	0.428768	83
Het2	eur16	GY	ADI_Inb	0.432706	83
Het2	eur16	GY	AA	0.412643	83
Het2	eur16	GY	A	0.479116	84
Het2	eur16	GY	A_Inb	0.508947	84
Het2	eur16	GY	AD	0.486161	84
Het2	eur16	GY	AD_Inb	0.502967	84
Het2	eur16	GY	ADI_Inb	0.50007	84
Het2	eur16	GY	AA	0.475774	84
Het2	eur16	GY	A	0.394151	85
Het2	eur16	GY	A_Inb	0.452391	85
Het2	eur16	GY	AD	0.391674	85
Het2	eur16	GY	AD_Inb	0.448546	85
Het2	eur16	GY	ADI_Inb	0.452787	85
Het2	eur16	GY	AA	0.382915	85
Het2	eur16	GY	A	0.427579	86
Het2	eur16	GY	A_Inb	0.465646	86
Het2	eur16	GY	AD	0.435533	86
Het2	eur16	GY	AD_Inb	0.46385	86
Het2	eur16	GY	ADI_Inb	0.467441	86
Het2	eur16	GY	AA	0.397784	86
Het2	eur16	GY	A	0.489642	87
Het2	eur16	GY	A_Inb	0.515776	87
Het2	eur16	GY	AD	0.493544	87
Het2	eur16	GY	AD_Inb	0.511614	87
Het2	eur16	GY	ADI_Inb	0.515739	87
Het2	eur16	GY	AA	0.495958	87
Het2	eur16	GY	A	0.444463	88
Het2	eur16	GY	A_Inb	0.478997	88
Het2	eur16	GY	AD	0.444251	88
Het2	eur16	GY	AD_Inb	0.474387	88
Het2	eur16	GY	ADI_Inb	0.480965	88
Het2	eur16	GY	AA	0.455606	88
Het2	eur16	GY	A	0.431824	89
Het2	eur16	GY	A_Inb	0.452518	89
Het2	eur16	GY	AD	0.436995	89
Het2	eur16	GY	AD_Inb	0.450847	89
Het2	eur16	GY	ADI_Inb	0.455374	89
Het2	eur16	GY	AA	0.443699	89
Het2	eur16	GY	A	0.407391	90
Het2	eur16	GY	A_Inb	0.455669	90
Het2	eur16	GY	AD	0.41407	90
Het2	eur16	GY	AD_Inb	0.4577	90
Het2	eur16	GY	ADI_Inb	0.462725	90
Het2	eur16	GY	AA	0.399811	90
Het2	eur16	GY	A	0.398086	91
Het2	eur16	GY	A_Inb	0.439719	91
Het2	eur16	GY	AD	0.398379	91
Het2	eur16	GY	AD_Inb	0.435011	91
Het2	eur16	GY	ADI_Inb	0.441738	91
Het2	eur16	GY	AA	0.406721	91
Het2	eur16	GY	A	0.4808	92
Het2	eur16	GY	A_Inb	0.509403	92
Het2	eur16	GY	AD	0.482175	92
Het2	eur16	GY	AD_Inb	0.504906	92
Het2	eur16	GY	ADI_Inb	0.508859	92
Het2	eur16	GY	AA	0.483444	92
Het2	eur16	GY	A	0.479898	93
Het2	eur16	GY	A_Inb	0.503449	93
Het2	eur16	GY	AD	0.48607	93
Het2	eur16	GY	AD_Inb	0.500217	93
Het2	eur16	GY	ADI_Inb	0.504292	93
Het2	eur16	GY	AA	0.479702	93
Het2	eur16	GY	A	0.404653	94
Het2	eur16	GY	A_Inb	0.437668	94
Het2	eur16	GY	AD	0.398312	94
Het2	eur16	GY	AD_Inb	0.425512	94
Het2	eur16	GY	ADI_Inb	0.429346	94
Het2	eur16	GY	AA	0.43349	94
Het2	eur16	GY	A	0.353113	95
Het2	eur16	GY	A_Inb	0.409945	95
Het2	eur16	GY	AD	0.350843	95
Het2	eur16	GY	AD_Inb	0.40577	95
Het2	eur16	GY	ADI_Inb	0.411416	95
Het2	eur16	GY	AA	0.334287	95
Het2	eur16	GY	A	0.433179	96
Het2	eur16	GY	A_Inb	0.483479	96
Het2	eur16	GY	AD	0.437749	96
Het2	eur16	GY	AD_Inb	0.483013	96
Het2	eur16	GY	ADI_Inb	0.485547	96
Het2	eur16	GY	AA	0.409126	96
Het2	eur16	GY	A	0.373824	97
Het2	eur16	GY	A_Inb	0.428331	97
Het2	eur16	GY	AD	0.374007	97
Het2	eur16	GY	AD_Inb	0.424722	97
Het2	eur16	GY	ADI_Inb	0.431745	97
Het2	eur16	GY	AA	0.355136	97
Het2	eur16	GY	A	0.411778	98
Het2	eur16	GY	A_Inb	0.442424	98
Het2	eur16	GY	AD	0.409419	98
Het2	eur16	GY	AD_Inb	0.442006	98
Het2	eur16	GY	ADI_Inb	0.446113	98
Het2	eur16	GY	AA	0.41283	98
Het2	eur16	GY	A	0.413784	99
Het2	eur16	GY	A_Inb	0.45355	99
Het2	eur16	GY	AD	0.423338	99
Het2	eur16	GY	AD_Inb	0.455114	99
Het2	eur16	GY	ADI_Inb	0.448974	99
Het2	eur16	GY	AA	0.393669	99
Het2	eur16	GY	A	0.471899	100
Het2	eur16	GY	A_Inb	0.501342	100
Het2	eur16	GY	AD	0.466184	100
Het2	eur16	GY	AD_Inb	0.494185	100
Het2	eur16	GY	ADI_Inb	0.500311	100
Het2	eur16	GY	AA	0.469467	100
Het2	lmg17	GY	A	0.416817	1
Het2	lmg17	GY	A_Inb	0.426493	1
Het2	lmg17	GY	AD	0.423486	1
Het2	lmg17	GY	AD_Inb	0.42809	1
Het2	lmg17	GY	ADI_Inb	0.427389	1
Het2	lmg17	GY	AA	0.398649	1
Het2	lmg17	GY	A	0.427393	2
Het2	lmg17	GY	A_Inb	0.438678	2
Het2	lmg17	GY	AD	0.440272	2
Het2	lmg17	GY	AD_Inb	0.44296	2
Het2	lmg17	GY	ADI_Inb	0.437369	2
Het2	lmg17	GY	AA	0.362401	2
Het2	lmg17	GY	A	0.340976	3
Het2	lmg17	GY	A_Inb	0.363933	3
Het2	lmg17	GY	AD	0.357473	3
Het2	lmg17	GY	AD_Inb	0.373422	3
Het2	lmg17	GY	ADI_Inb	0.366811	3
Het2	lmg17	GY	AA	0.358616	3
Het2	lmg17	GY	A	0.440514	4
Het2	lmg17	GY	A_Inb	0.431835	4
Het2	lmg17	GY	AD	0.443942	4
Het2	lmg17	GY	AD_Inb	0.436851	4
Het2	lmg17	GY	ADI_Inb	0.436952	4
Het2	lmg17	GY	AA	0.42072	4
Het2	lmg17	GY	A	0.357215	5
Het2	lmg17	GY	A_Inb	0.364058	5
Het2	lmg17	GY	AD	0.37094	5
Het2	lmg17	GY	AD_Inb	0.370695	5
Het2	lmg17	GY	ADI_Inb	0.365629	5
Het2	lmg17	GY	AA	0.301048	5
Het2	lmg17	GY	A	0.406116	6
Het2	lmg17	GY	A_Inb	0.409102	6
Het2	lmg17	GY	AD	0.420278	6
Het2	lmg17	GY	AD_Inb	0.417089	6
Het2	lmg17	GY	ADI_Inb	0.411116	6
Het2	lmg17	GY	AA	0.360846	6
Het2	lmg17	GY	A	0.416588	7
Het2	lmg17	GY	A_Inb	0.423876	7
Het2	lmg17	GY	AD	0.418766	7
Het2	lmg17	GY	AD_Inb	0.420144	7
Het2	lmg17	GY	ADI_Inb	0.421441	7
Het2	lmg17	GY	AA	0.387031	7
Het2	lmg17	GY	A	0.426787	8
Het2	lmg17	GY	A_Inb	0.431038	8
Het2	lmg17	GY	AD	0.432932	8
Het2	lmg17	GY	AD_Inb	0.433874	8
Het2	lmg17	GY	ADI_Inb	0.431216	8
Het2	lmg17	GY	AA	0.3839	8
Het2	lmg17	GY	A	0.382413	9
Het2	lmg17	GY	A_Inb	0.380514	9
Het2	lmg17	GY	AD	0.376771	9
Het2	lmg17	GY	AD_Inb	0.375087	9
Het2	lmg17	GY	ADI_Inb	0.375138	9
Het2	lmg17	GY	AA	0.349692	9
Het2	lmg17	GY	A	0.43581	10
Het2	lmg17	GY	A_Inb	0.440592	10
Het2	lmg17	GY	AD	0.451495	10
Het2	lmg17	GY	AD_Inb	0.447372	10
Het2	lmg17	GY	ADI_Inb	0.440791	10
Het2	lmg17	GY	AA	0.390653	10
Het2	lmg17	GY	A	0.46765	11
Het2	lmg17	GY	A_Inb	0.464985	11
Het2	lmg17	GY	AD	0.473508	11
Het2	lmg17	GY	AD_Inb	0.467314	11
Het2	lmg17	GY	ADI_Inb	0.463833	11
Het2	lmg17	GY	AA	0.487647	11
Het2	lmg17	GY	A	0.496764	12
Het2	lmg17	GY	A_Inb	0.486399	12
Het2	lmg17	GY	AD	0.498622	12
Het2	lmg17	GY	AD_Inb	0.484312	12
Het2	lmg17	GY	ADI_Inb	0.483325	12
Het2	lmg17	GY	AA	0.462518	12
Het2	lmg17	GY	A	0.411071	13
Het2	lmg17	GY	A_Inb	0.415412	13
Het2	lmg17	GY	AD	0.416356	13
Het2	lmg17	GY	AD_Inb	0.417334	13
Het2	lmg17	GY	ADI_Inb	0.415569	13
Het2	lmg17	GY	AA	0.344301	13
Het2	lmg17	GY	A	0.42148	14
Het2	lmg17	GY	A_Inb	0.430187	14
Het2	lmg17	GY	AD	0.438184	14
Het2	lmg17	GY	AD_Inb	0.437828	14
Het2	lmg17	GY	ADI_Inb	0.433024	14
Het2	lmg17	GY	AA	0.411865	14
Het2	lmg17	GY	A	0.398415	15
Het2	lmg17	GY	A_Inb	0.408876	15
Het2	lmg17	GY	AD	0.41047	15
Het2	lmg17	GY	AD_Inb	0.41253	15
Het2	lmg17	GY	ADI_Inb	0.411772	15
Het2	lmg17	GY	AA	0.366593	15
Het2	lmg17	GY	A	0.361404	16
Het2	lmg17	GY	A_Inb	0.379243	16
Het2	lmg17	GY	AD	0.382969	16
Het2	lmg17	GY	AD_Inb	0.390818	16
Het2	lmg17	GY	ADI_Inb	0.386948	16
Het2	lmg17	GY	AA	0.333491	16
Het2	lmg17	GY	A	0.407367	17
Het2	lmg17	GY	A_Inb	0.406251	17
Het2	lmg17	GY	AD	0.416087	17
Het2	lmg17	GY	AD_Inb	0.408132	17
Het2	lmg17	GY	ADI_Inb	0.405873	17
Het2	lmg17	GY	AA	0.342315	17
Het2	lmg17	GY	A	0.36741	18
Het2	lmg17	GY	A_Inb	0.378806	18
Het2	lmg17	GY	AD	0.378356	18
Het2	lmg17	GY	AD_Inb	0.383411	18
Het2	lmg17	GY	ADI_Inb	0.382274	18
Het2	lmg17	GY	AA	0.366446	18
Het2	lmg17	GY	A	0.372684	19
Het2	lmg17	GY	A_Inb	0.386132	19
Het2	lmg17	GY	AD	0.373254	19
Het2	lmg17	GY	AD_Inb	0.383201	19
Het2	lmg17	GY	ADI_Inb	0.386827	19
Het2	lmg17	GY	AA	0.327671	19
Het2	lmg17	GY	A	0.475549	20
Het2	lmg17	GY	A_Inb	0.47057	20
Het2	lmg17	GY	AD	0.47377	20
Het2	lmg17	GY	AD_Inb	0.463893	20
Het2	lmg17	GY	ADI_Inb	0.461863	20
Het2	lmg17	GY	AA	0.437078	20
Het2	lmg17	GY	A	0.405223	21
Het2	lmg17	GY	A_Inb	0.389738	21
Het2	lmg17	GY	AD	0.409819	21
Het2	lmg17	GY	AD_Inb	0.392526	21
Het2	lmg17	GY	ADI_Inb	0.391281	21
Het2	lmg17	GY	AA	0.409633	21
Het2	lmg17	GY	A	0.472112	22
Het2	lmg17	GY	A_Inb	0.472025	22
Het2	lmg17	GY	AD	0.467524	22
Het2	lmg17	GY	AD_Inb	0.461978	22
Het2	lmg17	GY	ADI_Inb	0.464555	22
Het2	lmg17	GY	AA	0.456162	22
Het2	lmg17	GY	A	0.382848	23
Het2	lmg17	GY	A_Inb	0.390082	23
Het2	lmg17	GY	AD	0.392264	23
Het2	lmg17	GY	AD_Inb	0.392377	23
Het2	lmg17	GY	ADI_Inb	0.390262	23
Het2	lmg17	GY	AA	0.319707	23
Het2	lmg17	GY	A	0.450266	24
Het2	lmg17	GY	A_Inb	0.450901	24
Het2	lmg17	GY	AD	0.460004	24
Het2	lmg17	GY	AD_Inb	0.45744	24
Het2	lmg17	GY	ADI_Inb	0.451899	24
Het2	lmg17	GY	AA	0.394988	24
Het2	lmg17	GY	A	0.418591	25
Het2	lmg17	GY	A_Inb	0.429869	25
Het2	lmg17	GY	AD	0.431755	25
Het2	lmg17	GY	AD_Inb	0.436812	25
Het2	lmg17	GY	ADI_Inb	0.434588	25
Het2	lmg17	GY	AA	0.367463	25
Het2	lmg17	GY	A	0.378287	26
Het2	lmg17	GY	A_Inb	0.383301	26
Het2	lmg17	GY	AD	0.389104	26
Het2	lmg17	GY	AD_Inb	0.388735	26
Het2	lmg17	GY	ADI_Inb	0.384158	26
Het2	lmg17	GY	AA	0.324585	26
Het2	lmg17	GY	A	0.464015	27
Het2	lmg17	GY	A_Inb	0.469649	27
Het2	lmg17	GY	AD	0.478271	27
Het2	lmg17	GY	AD_Inb	0.477744	27
Het2	lmg17	GY	ADI_Inb	0.473978	27
Het2	lmg17	GY	AA	0.439225	27
Het2	lmg17	GY	A	0.405888	28
Het2	lmg17	GY	A_Inb	0.423634	28
Het2	lmg17	GY	AD	0.415527	28
Het2	lmg17	GY	AD_Inb	0.426775	28
Het2	lmg17	GY	ADI_Inb	0.424659	28
Het2	lmg17	GY	AA	0.364986	28
Het2	lmg17	GY	A	0.4195	29
Het2	lmg17	GY	A_Inb	0.431756	29
Het2	lmg17	GY	AD	0.434351	29
Het2	lmg17	GY	AD_Inb	0.439631	29
Het2	lmg17	GY	ADI_Inb	0.435045	29
Het2	lmg17	GY	AA	0.351401	29
Het2	lmg17	GY	A	0.436921	30
Het2	lmg17	GY	A_Inb	0.450415	30
Het2	lmg17	GY	AD	0.445954	30
Het2	lmg17	GY	AD_Inb	0.452463	30
Het2	lmg17	GY	ADI_Inb	0.450597	30
Het2	lmg17	GY	AA	0.409647	30
Het2	lmg17	GY	A	0.416906	31
Het2	lmg17	GY	A_Inb	0.430158	31
Het2	lmg17	GY	AD	0.426914	31
Het2	lmg17	GY	AD_Inb	0.435745	31
Het2	lmg17	GY	ADI_Inb	0.4309	31
Het2	lmg17	GY	AA	0.341957	31
Het2	lmg17	GY	A	0.394034	32
Het2	lmg17	GY	A_Inb	0.406441	32
Het2	lmg17	GY	AD	0.406922	32
Het2	lmg17	GY	AD_Inb	0.413767	32
Het2	lmg17	GY	ADI_Inb	0.410629	32
Het2	lmg17	GY	AA	0.35686	32
Het2	lmg17	GY	A	0.454749	33
Het2	lmg17	GY	A_Inb	0.467594	33
Het2	lmg17	GY	AD	0.454319	33
Het2	lmg17	GY	AD_Inb	0.45916	33
Het2	lmg17	GY	ADI_Inb	0.461086	33
Het2	lmg17	GY	AA	0.435967	33
Het2	lmg17	GY	A	0.406983	34
Het2	lmg17	GY	A_Inb	0.412685	34
Het2	lmg17	GY	AD	0.409509	34
Het2	lmg17	GY	AD_Inb	0.411475	34
Het2	lmg17	GY	ADI_Inb	0.409398	34
Het2	lmg17	GY	AA	0.35041	34
Het2	lmg17	GY	A	0.4117	35
Het2	lmg17	GY	A_Inb	0.403102	35
Het2	lmg17	GY	AD	0.417733	35
Het2	lmg17	GY	AD_Inb	0.405881	35
Het2	lmg17	GY	ADI_Inb	0.404375	35
Het2	lmg17	GY	AA	0.406526	35
Het2	lmg17	GY	A	0.437673	36
Het2	lmg17	GY	A_Inb	0.435607	36
Het2	lmg17	GY	AD	0.451889	36
Het2	lmg17	GY	AD_Inb	0.443381	36
Het2	lmg17	GY	ADI_Inb	0.44099	36
Het2	lmg17	GY	AA	0.375831	36
Het2	lmg17	GY	A	0.335323	37
Het2	lmg17	GY	A_Inb	0.319873	37
Het2	lmg17	GY	AD	0.340607	37
Het2	lmg17	GY	AD_Inb	0.322089	37
Het2	lmg17	GY	ADI_Inb	0.321531	37
Het2	lmg17	GY	AA	0.303935	37
Het2	lmg17	GY	A	0.459648	38
Het2	lmg17	GY	A_Inb	0.46905	38
Het2	lmg17	GY	AD	0.459077	38
Het2	lmg17	GY	AD_Inb	0.461495	38
Het2	lmg17	GY	ADI_Inb	0.463417	38
Het2	lmg17	GY	AA	0.452437	38
Het2	lmg17	GY	A	0.393593	39
Het2	lmg17	GY	A_Inb	0.399457	39
Het2	lmg17	GY	AD	0.403731	39
Het2	lmg17	GY	AD_Inb	0.404896	39
Het2	lmg17	GY	ADI_Inb	0.404289	39
Het2	lmg17	GY	AA	0.387257	39
Het2	lmg17	GY	A	0.398202	40
Het2	lmg17	GY	A_Inb	0.402839	40
Het2	lmg17	GY	AD	0.403407	40
Het2	lmg17	GY	AD_Inb	0.402863	40
Het2	lmg17	GY	ADI_Inb	0.40082	40
Het2	lmg17	GY	AA	0.375695	40
Het2	lmg17	GY	A	0.422641	41
Het2	lmg17	GY	A_Inb	0.427714	41
Het2	lmg17	GY	AD	0.430033	41
Het2	lmg17	GY	AD_Inb	0.427993	41
Het2	lmg17	GY	ADI_Inb	0.428103	41
Het2	lmg17	GY	AA	0.384897	41
Het2	lmg17	GY	A	0.419588	42
Het2	lmg17	GY	A_Inb	0.438961	42
Het2	lmg17	GY	AD	0.423749	42
Het2	lmg17	GY	AD_Inb	0.437522	42
Het2	lmg17	GY	ADI_Inb	0.437779	42
Het2	lmg17	GY	AA	0.349375	42
Het2	lmg17	GY	A	0.445498	43
Het2	lmg17	GY	A_Inb	0.442872	43
Het2	lmg17	GY	AD	0.438929	43
Het2	lmg17	GY	AD_Inb	0.433566	43
Het2	lmg17	GY	ADI_Inb	0.432847	43
Het2	lmg17	GY	AA	0.405156	43
Het2	lmg17	GY	A	0.452806	44
Het2	lmg17	GY	A_Inb	0.465047	44
Het2	lmg17	GY	AD	0.459459	44
Het2	lmg17	GY	AD_Inb	0.465778	44
Het2	lmg17	GY	ADI_Inb	0.464571	44
Het2	lmg17	GY	AA	0.431367	44
Het2	lmg17	GY	A	0.41334	45
Het2	lmg17	GY	A_Inb	0.42047	45
Het2	lmg17	GY	AD	0.423148	45
Het2	lmg17	GY	AD_Inb	0.424323	45
Het2	lmg17	GY	ADI_Inb	0.419244	45
Het2	lmg17	GY	AA	0.383287	45
Het2	lmg17	GY	A	0.413967	46
Het2	lmg17	GY	A_Inb	0.408747	46
Het2	lmg17	GY	AD	0.419992	46
Het2	lmg17	GY	AD_Inb	0.408503	46
Het2	lmg17	GY	ADI_Inb	0.40861	46
Het2	lmg17	GY	AA	0.392974	46
Het2	lmg17	GY	A	0.454499	47
Het2	lmg17	GY	A_Inb	0.456022	47
Het2	lmg17	GY	AD	0.456868	47
Het2	lmg17	GY	AD_Inb	0.457036	47
Het2	lmg17	GY	ADI_Inb	0.457347	47
Het2	lmg17	GY	AA	0.432514	47
Het2	lmg17	GY	A	0.421106	48
Het2	lmg17	GY	A_Inb	0.418924	48
Het2	lmg17	GY	AD	0.420816	48
Het2	lmg17	GY	AD_Inb	0.41737	48
Het2	lmg17	GY	ADI_Inb	0.415955	48
Het2	lmg17	GY	AA	0.398147	48
Het2	lmg17	GY	A	0.404784	49
Het2	lmg17	GY	A_Inb	0.409525	49
Het2	lmg17	GY	AD	0.411695	49
Het2	lmg17	GY	AD_Inb	0.411722	49
Het2	lmg17	GY	ADI_Inb	0.409943	49
Het2	lmg17	GY	AA	0.402065	49
Het2	lmg17	GY	A	0.353814	50
Het2	lmg17	GY	A_Inb	0.373517	50
Het2	lmg17	GY	AD	0.361645	50
Het2	lmg17	GY	AD_Inb	0.375462	50
Het2	lmg17	GY	ADI_Inb	0.374056	50
Het2	lmg17	GY	AA	0.364542	50
Het2	lmg17	GY	A	0.449506	51
Het2	lmg17	GY	A_Inb	0.456157	51
Het2	lmg17	GY	AD	0.458565	51
Het2	lmg17	GY	AD_Inb	0.458938	51
Het2	lmg17	GY	ADI_Inb	0.456877	51
Het2	lmg17	GY	AA	0.423806	51
Het2	lmg17	GY	A	0.414017	52
Het2	lmg17	GY	A_Inb	0.435365	52
Het2	lmg17	GY	AD	0.422796	52
Het2	lmg17	GY	AD_Inb	0.441026	52
Het2	lmg17	GY	ADI_Inb	0.43972	52
Het2	lmg17	GY	AA	0.40328	52
Het2	lmg17	GY	A	0.421591	53
Het2	lmg17	GY	A_Inb	0.426334	53
Het2	lmg17	GY	AD	0.430051	53
Het2	lmg17	GY	AD_Inb	0.427025	53
Het2	lmg17	GY	ADI_Inb	0.425122	53
Het2	lmg17	GY	AA	0.397303	53
Het2	lmg17	GY	A	0.392718	54
Het2	lmg17	GY	A_Inb	0.404067	54
Het2	lmg17	GY	AD	0.404716	54
Het2	lmg17	GY	AD_Inb	0.41045	54
Het2	lmg17	GY	ADI_Inb	0.407476	54
Het2	lmg17	GY	AA	0.359352	54
Het2	lmg17	GY	A	0.408974	55
Het2	lmg17	GY	A_Inb	0.418497	55
Het2	lmg17	GY	AD	0.423146	55
Het2	lmg17	GY	AD_Inb	0.428026	55
Het2	lmg17	GY	ADI_Inb	0.427489	55
Het2	lmg17	GY	AA	0.404814	55
Het2	lmg17	GY	A	0.40779	56
Het2	lmg17	GY	A_Inb	0.425923	56
Het2	lmg17	GY	AD	0.418366	56
Het2	lmg17	GY	AD_Inb	0.431415	56
Het2	lmg17	GY	ADI_Inb	0.428143	56
Het2	lmg17	GY	AA	0.373126	56
Het2	lmg17	GY	A	0.404255	57
Het2	lmg17	GY	A_Inb	0.412184	57
Het2	lmg17	GY	AD	0.416324	57
Het2	lmg17	GY	AD_Inb	0.418401	57
Het2	lmg17	GY	ADI_Inb	0.413898	57
Het2	lmg17	GY	AA	0.347014	57
Het2	lmg17	GY	A	0.400994	58
Het2	lmg17	GY	A_Inb	0.416293	58
Het2	lmg17	GY	AD	0.413875	58
Het2	lmg17	GY	AD_Inb	0.423824	58
Het2	lmg17	GY	ADI_Inb	0.421984	58
Het2	lmg17	GY	AA	0.328495	58
Het2	lmg17	GY	A	0.442023	59
Het2	lmg17	GY	A_Inb	0.446638	59
Het2	lmg17	GY	AD	0.452504	59
Het2	lmg17	GY	AD_Inb	0.450389	59
Het2	lmg17	GY	ADI_Inb	0.447184	59
Het2	lmg17	GY	AA	0.391002	59
Het2	lmg17	GY	A	0.375162	60
Het2	lmg17	GY	A_Inb	0.38464	60
Het2	lmg17	GY	AD	0.386481	60
Het2	lmg17	GY	AD_Inb	0.388217	60
Het2	lmg17	GY	ADI_Inb	0.388866	60
Het2	lmg17	GY	AA	0.308726	60
Het2	lmg17	GY	A	0.418149	61
Het2	lmg17	GY	A_Inb	0.437718	61
Het2	lmg17	GY	AD	0.433401	61
Het2	lmg17	GY	AD_Inb	0.444961	61
Het2	lmg17	GY	ADI_Inb	0.442569	61
Het2	lmg17	GY	AA	0.338943	61
Het2	lmg17	GY	A	0.379204	62
Het2	lmg17	GY	A_Inb	0.388101	62
Het2	lmg17	GY	AD	0.384447	62
Het2	lmg17	GY	AD_Inb	0.38751	62
Het2	lmg17	GY	ADI_Inb	0.38853	62
Het2	lmg17	GY	AA	0.372582	62
Het2	lmg17	GY	A	0.427595	63
Het2	lmg17	GY	A_Inb	0.434674	63
Het2	lmg17	GY	AD	0.44199	63
Het2	lmg17	GY	AD_Inb	0.442405	63
Het2	lmg17	GY	ADI_Inb	0.434578	63
Het2	lmg17	GY	AA	0.371519	63
Het2	lmg17	GY	A	0.464371	64
Het2	lmg17	GY	A_Inb	0.479778	64
Het2	lmg17	GY	AD	0.461697	64
Het2	lmg17	GY	AD_Inb	0.472273	64
Het2	lmg17	GY	ADI_Inb	0.471634	64
Het2	lmg17	GY	AA	0.450719	64
Het2	lmg17	GY	A	0.310139	65
Het2	lmg17	GY	A_Inb	0.325017	65
Het2	lmg17	GY	AD	0.32817	65
Het2	lmg17	GY	AD_Inb	0.334595	65
Het2	lmg17	GY	ADI_Inb	0.329779	65
Het2	lmg17	GY	AA	0.259492	65
Het2	lmg17	GY	A	0.436225	66
Het2	lmg17	GY	A_Inb	0.445782	66
Het2	lmg17	GY	AD	0.44138	66
Het2	lmg17	GY	AD_Inb	0.4473	66
Het2	lmg17	GY	ADI_Inb	0.445349	66
Het2	lmg17	GY	AA	0.373507	66
Het2	lmg17	GY	A	0.420055	67
Het2	lmg17	GY	A_Inb	0.422643	67
Het2	lmg17	GY	AD	0.416605	67
Het2	lmg17	GY	AD_Inb	0.414784	67
Het2	lmg17	GY	ADI_Inb	0.413562	67
Het2	lmg17	GY	AA	0.401103	67
Het2	lmg17	GY	A	0.394633	68
Het2	lmg17	GY	A_Inb	0.405838	68
Het2	lmg17	GY	AD	0.400182	68
Het2	lmg17	GY	AD_Inb	0.406282	68
Het2	lmg17	GY	ADI_Inb	0.406221	68
Het2	lmg17	GY	AA	0.346186	68
Het2	lmg17	GY	A	0.39549	69
Het2	lmg17	GY	A_Inb	0.40527	69
Het2	lmg17	GY	AD	0.412376	69
Het2	lmg17	GY	AD_Inb	0.414122	69
Het2	lmg17	GY	ADI_Inb	0.409182	69
Het2	lmg17	GY	AA	0.335948	69
Het2	lmg17	GY	A	0.443301	70
Het2	lmg17	GY	A_Inb	0.428847	70
Het2	lmg17	GY	AD	0.45432	70
Het2	lmg17	GY	AD_Inb	0.431786	70
Het2	lmg17	GY	ADI_Inb	0.423388	70
Het2	lmg17	GY	AA	0.385894	70
Het2	lmg17	GY	A	0.445193	71
Het2	lmg17	GY	A_Inb	0.452904	71
Het2	lmg17	GY	AD	0.456008	71
Het2	lmg17	GY	AD_Inb	0.456857	71
Het2	lmg17	GY	ADI_Inb	0.456204	71
Het2	lmg17	GY	AA	0.396834	71
Het2	lmg17	GY	A	0.451513	72
Het2	lmg17	GY	A_Inb	0.448825	72
Het2	lmg17	GY	AD	0.464471	72
Het2	lmg17	GY	AD_Inb	0.453157	72
Het2	lmg17	GY	ADI_Inb	0.448435	72
Het2	lmg17	GY	AA	0.436642	72
Het2	lmg17	GY	A	0.446168	73
Het2	lmg17	GY	A_Inb	0.444756	73
Het2	lmg17	GY	AD	0.462029	73
Het2	lmg17	GY	AD_Inb	0.451267	73
Het2	lmg17	GY	ADI_Inb	0.447262	73
Het2	lmg17	GY	AA	0.40329	73
Het2	lmg17	GY	A	0.443303	74
Het2	lmg17	GY	A_Inb	0.449208	74
Het2	lmg17	GY	AD	0.441236	74
Het2	lmg17	GY	AD_Inb	0.443597	74
Het2	lmg17	GY	ADI_Inb	0.444574	74
Het2	lmg17	GY	AA	0.409497	74
Het2	lmg17	GY	A	0.414337	75
Het2	lmg17	GY	A_Inb	0.418898	75
Het2	lmg17	GY	AD	0.428902	75
Het2	lmg17	GY	AD_Inb	0.426883	75
Het2	lmg17	GY	ADI_Inb	0.426624	75
Het2	lmg17	GY	AA	0.402723	75
Het2	lmg17	GY	A	0.369353	76
Het2	lmg17	GY	A_Inb	0.374523	76
Het2	lmg17	GY	AD	0.379783	76
Het2	lmg17	GY	AD_Inb	0.379194	76
Het2	lmg17	GY	ADI_Inb	0.376965	76
Het2	lmg17	GY	AA	0.359632	76
Het2	lmg17	GY	A	0.381719	77
Het2	lmg17	GY	A_Inb	0.395491	77
Het2	lmg17	GY	AD	0.386852	77
Het2	lmg17	GY	AD_Inb	0.392953	77
Het2	lmg17	GY	ADI_Inb	0.392925	77
Het2	lmg17	GY	AA	0.336206	77
Het2	lmg17	GY	A	0.340105	78
Het2	lmg17	GY	A_Inb	0.354547	78
Het2	lmg17	GY	AD	0.355464	78
Het2	lmg17	GY	AD_Inb	0.364488	78
Het2	lmg17	GY	ADI_Inb	0.360136	78
Het2	lmg17	GY	AA	0.28984	78
Het2	lmg17	GY	A	0.391072	79
Het2	lmg17	GY	A_Inb	0.401432	79
Het2	lmg17	GY	AD	0.399021	79
Het2	lmg17	GY	AD_Inb	0.404654	79
Het2	lmg17	GY	ADI_Inb	0.403981	79
Het2	lmg17	GY	AA	0.374704	79
Het2	lmg17	GY	A	0.489117	80
Het2	lmg17	GY	A_Inb	0.493503	80
Het2	lmg17	GY	AD	0.486457	80
Het2	lmg17	GY	AD_Inb	0.486233	80
Het2	lmg17	GY	ADI_Inb	0.48729	80
Het2	lmg17	GY	AA	0.498701	80
Het2	lmg17	GY	A	0.425561	81
Het2	lmg17	GY	A_Inb	0.433686	81
Het2	lmg17	GY	AD	0.437767	81
Het2	lmg17	GY	AD_Inb	0.441564	81
Het2	lmg17	GY	ADI_Inb	0.436923	81
Het2	lmg17	GY	AA	0.382036	81
Het2	lmg17	GY	A	0.421097	82
Het2	lmg17	GY	A_Inb	0.421438	82
Het2	lmg17	GY	AD	0.421566	82
Het2	lmg17	GY	AD_Inb	0.410472	82
Het2	lmg17	GY	ADI_Inb	0.41077	82
Het2	lmg17	GY	AA	0.389269	82
Het2	lmg17	GY	A	0.402136	83
Het2	lmg17	GY	A_Inb	0.40691	83
Het2	lmg17	GY	AD	0.410178	83
Het2	lmg17	GY	AD_Inb	0.411784	83
Het2	lmg17	GY	ADI_Inb	0.409615	83
Het2	lmg17	GY	AA	0.367619	83
Het2	lmg17	GY	A	0.407991	84
Het2	lmg17	GY	A_Inb	0.421266	84
Het2	lmg17	GY	AD	0.418689	84
Het2	lmg17	GY	AD_Inb	0.42339	84
Het2	lmg17	GY	ADI_Inb	0.418969	84
Het2	lmg17	GY	AA	0.380471	84
Het2	lmg17	GY	A	0.424715	85
Het2	lmg17	GY	A_Inb	0.426987	85
Het2	lmg17	GY	AD	0.433843	85
Het2	lmg17	GY	AD_Inb	0.429037	85
Het2	lmg17	GY	ADI_Inb	0.427905	85
Het2	lmg17	GY	AA	0.373256	85
Het2	lmg17	GY	A	0.393382	86
Het2	lmg17	GY	A_Inb	0.391737	86
Het2	lmg17	GY	AD	0.399326	86
Het2	lmg17	GY	AD_Inb	0.391255	86
Het2	lmg17	GY	ADI_Inb	0.38972	86
Het2	lmg17	GY	AA	0.346557	86
Het2	lmg17	GY	A	0.439957	87
Het2	lmg17	GY	A_Inb	0.438318	87
Het2	lmg17	GY	AD	0.443421	87
Het2	lmg17	GY	AD_Inb	0.439502	87
Het2	lmg17	GY	ADI_Inb	0.433314	87
Het2	lmg17	GY	AA	0.367275	87
Het2	lmg17	GY	A	0.473893	88
Het2	lmg17	GY	A_Inb	0.477433	88
Het2	lmg17	GY	AD	0.481292	88
Het2	lmg17	GY	AD_Inb	0.480846	88
Het2	lmg17	GY	ADI_Inb	0.478169	88
Het2	lmg17	GY	AA	0.432537	88
Het2	lmg17	GY	A	0.401003	89
Het2	lmg17	GY	A_Inb	0.395391	89
Het2	lmg17	GY	AD	0.41367	89
Het2	lmg17	GY	AD_Inb	0.40441	89
Het2	lmg17	GY	ADI_Inb	0.403985	89
Het2	lmg17	GY	AA	0.372011	89
Het2	lmg17	GY	A	0.414099	90
Het2	lmg17	GY	A_Inb	0.414091	90
Het2	lmg17	GY	AD	0.420599	90
Het2	lmg17	GY	AD_Inb	0.414919	90
Het2	lmg17	GY	ADI_Inb	0.413211	90
Het2	lmg17	GY	AA	0.358763	90
Het2	lmg17	GY	A	0.426511	91
Het2	lmg17	GY	A_Inb	0.442074	91
Het2	lmg17	GY	AD	0.436869	91
Het2	lmg17	GY	AD_Inb	0.447204	91
Het2	lmg17	GY	ADI_Inb	0.445241	91
Het2	lmg17	GY	AA	0.432975	91
Het2	lmg17	GY	A	0.407987	92
Het2	lmg17	GY	A_Inb	0.408257	92
Het2	lmg17	GY	AD	0.413977	92
Het2	lmg17	GY	AD_Inb	0.41031	92
Het2	lmg17	GY	ADI_Inb	0.40884	92
Het2	lmg17	GY	AA	0.368047	92
Het2	lmg17	GY	A	0.423454	93
Het2	lmg17	GY	A_Inb	0.415735	93
Het2	lmg17	GY	AD	0.426617	93
Het2	lmg17	GY	AD_Inb	0.415305	93
Het2	lmg17	GY	ADI_Inb	0.413794	93
Het2	lmg17	GY	AA	0.377133	93
Het2	lmg17	GY	A	0.458937	94
Het2	lmg17	GY	A_Inb	0.449977	94
Het2	lmg17	GY	AD	0.462982	94
Het2	lmg17	GY	AD_Inb	0.449934	94
Het2	lmg17	GY	ADI_Inb	0.449402	94
Het2	lmg17	GY	AA	0.445838	94
Het2	lmg17	GY	A	0.430585	95
Het2	lmg17	GY	A_Inb	0.4425	95
Het2	lmg17	GY	AD	0.444452	95
Het2	lmg17	GY	AD_Inb	0.450091	95
Het2	lmg17	GY	ADI_Inb	0.44739	95
Het2	lmg17	GY	AA	0.38732	95
Het2	lmg17	GY	A	0.452499	96
Het2	lmg17	GY	A_Inb	0.460936	96
Het2	lmg17	GY	AD	0.466538	96
Het2	lmg17	GY	AD_Inb	0.468167	96
Het2	lmg17	GY	ADI_Inb	0.465802	96
Het2	lmg17	GY	AA	0.400374	96
Het2	lmg17	GY	A	0.427842	97
Het2	lmg17	GY	A_Inb	0.42845	97
Het2	lmg17	GY	AD	0.431238	97
Het2	lmg17	GY	AD_Inb	0.427683	97
Het2	lmg17	GY	ADI_Inb	0.427445	97
Het2	lmg17	GY	AA	0.387215	97
Het2	lmg17	GY	A	0.389215	98
Het2	lmg17	GY	A_Inb	0.384515	98
Het2	lmg17	GY	AD	0.399615	98
Het2	lmg17	GY	AD_Inb	0.389867	98
Het2	lmg17	GY	ADI_Inb	0.387262	98
Het2	lmg17	GY	AA	0.367787	98
Het2	lmg17	GY	A	0.38107	99
Het2	lmg17	GY	A_Inb	0.389876	99
Het2	lmg17	GY	AD	0.393803	99
Het2	lmg17	GY	AD_Inb	0.395184	99
Het2	lmg17	GY	ADI_Inb	0.393481	99
Het2	lmg17	GY	AA	0.359533	99
Het2	lmg17	GY	A	0.40977	100
Het2	lmg17	GY	A_Inb	0.423927	100
Het2	lmg17	GY	AD	0.41952	100
Het2	lmg17	GY	AD_Inb	0.426818	100
Het2	lmg17	GY	ADI_Inb	0.425328	100
Het2	lmg17	GY	AA	0.412483	100
Het2	mas17	GY	A	0.418444	1
Het2	mas17	GY	A_Inb	0.433308	1
Het2	mas17	GY	AD	0.427857	1
Het2	mas17	GY	AD_Inb	0.43918	1
Het2	mas17	GY	ADI_Inb	0.435111	1
Het2	mas17	GY	AA	0.350031	1
Het2	mas17	GY	A	0.45496	2
Het2	mas17	GY	A_Inb	0.438664	2
Het2	mas17	GY	AD	0.454733	2
Het2	mas17	GY	AD_Inb	0.437739	2
Het2	mas17	GY	ADI_Inb	0.431784	2
Het2	mas17	GY	AA	0.363852	2
Het2	mas17	GY	A	0.459206	3
Het2	mas17	GY	A_Inb	0.447468	3
Het2	mas17	GY	AD	0.462978	3
Het2	mas17	GY	AD_Inb	0.450335	3
Het2	mas17	GY	ADI_Inb	0.446745	3
Het2	mas17	GY	AA	0.388719	3
Het2	mas17	GY	A	0.42666	4
Het2	mas17	GY	A_Inb	0.427445	4
Het2	mas17	GY	AD	0.426842	4
Het2	mas17	GY	AD_Inb	0.421619	4
Het2	mas17	GY	ADI_Inb	0.424353	4
Het2	mas17	GY	AA	0.369967	4
Het2	mas17	GY	A	0.43008	5
Het2	mas17	GY	A_Inb	0.437695	5
Het2	mas17	GY	AD	0.4328	5
Het2	mas17	GY	AD_Inb	0.436489	5
Het2	mas17	GY	ADI_Inb	0.434173	5
Het2	mas17	GY	AA	0.34389	5
Het2	mas17	GY	A	0.407549	6
Het2	mas17	GY	A_Inb	0.414458	6
Het2	mas17	GY	AD	0.402666	6
Het2	mas17	GY	AD_Inb	0.406709	6
Het2	mas17	GY	ADI_Inb	0.401301	6
Het2	mas17	GY	AA	0.3218	6
Het2	mas17	GY	A	0.469503	7
Het2	mas17	GY	A_Inb	0.469269	7
Het2	mas17	GY	AD	0.466908	7
Het2	mas17	GY	AD_Inb	0.463527	7
Het2	mas17	GY	ADI_Inb	0.462028	7
Het2	mas17	GY	AA	0.384772	7
Het2	mas17	GY	A	0.52496	8
Het2	mas17	GY	A_Inb	0.517295	8
Het2	mas17	GY	AD	0.511375	8
Het2	mas17	GY	AD_Inb	0.500646	8
Het2	mas17	GY	ADI_Inb	0.49829	8
Het2	mas17	GY	AA	0.442581	8
Het2	mas17	GY	A	0.489368	9
Het2	mas17	GY	A_Inb	0.47063	9
Het2	mas17	GY	AD	0.488145	9
Het2	mas17	GY	AD_Inb	0.464978	9
Het2	mas17	GY	ADI_Inb	0.461048	9
Het2	mas17	GY	AA	0.382555	9
Het2	mas17	GY	A	0.500414	10
Het2	mas17	GY	A_Inb	0.510593	10
Het2	mas17	GY	AD	0.493384	10
Het2	mas17	GY	AD_Inb	0.499535	10
Het2	mas17	GY	ADI_Inb	0.497037	10
Het2	mas17	GY	AA	0.442786	10
Het2	mas17	GY	A	0.459215	11
Het2	mas17	GY	A_Inb	0.455625	11
Het2	mas17	GY	AD	0.457832	11
Het2	mas17	GY	AD_Inb	0.44929	11
Het2	mas17	GY	ADI_Inb	0.444929	11
Het2	mas17	GY	AA	0.361662	11
Het2	mas17	GY	A	0.49055	12
Het2	mas17	GY	A_Inb	0.488353	12
Het2	mas17	GY	AD	0.470271	12
Het2	mas17	GY	AD_Inb	0.460799	12
Het2	mas17	GY	ADI_Inb	0.463171	12
Het2	mas17	GY	AA	0.428796	12
Het2	mas17	GY	A	0.428629	13
Het2	mas17	GY	A_Inb	0.416423	13
Het2	mas17	GY	AD	0.426759	13
Het2	mas17	GY	AD_Inb	0.410951	13
Het2	mas17	GY	ADI_Inb	0.408247	13
Het2	mas17	GY	AA	0.385745	13
Het2	mas17	GY	A	0.406101	14
Het2	mas17	GY	A_Inb	0.41571	14
Het2	mas17	GY	AD	0.396177	14
Het2	mas17	GY	AD_Inb	0.403148	14
Het2	mas17	GY	ADI_Inb	0.402107	14
Het2	mas17	GY	AA	0.346806	14
Het2	mas17	GY	A	0.486279	15
Het2	mas17	GY	A_Inb	0.490057	15
Het2	mas17	GY	AD	0.485596	15
Het2	mas17	GY	AD_Inb	0.486263	15
Het2	mas17	GY	ADI_Inb	0.483854	15
Het2	mas17	GY	AA	0.408964	15
Het2	mas17	GY	A	0.516734	16
Het2	mas17	GY	A_Inb	0.497903	16
Het2	mas17	GY	AD	0.518268	16
Het2	mas17	GY	AD_Inb	0.49685	16
Het2	mas17	GY	ADI_Inb	0.496027	16
Het2	mas17	GY	AA	0.434046	16
Het2	mas17	GY	A	0.479922	17
Het2	mas17	GY	A_Inb	0.479742	17
Het2	mas17	GY	AD	0.472358	17
Het2	mas17	GY	AD_Inb	0.470225	17
Het2	mas17	GY	ADI_Inb	0.470408	17
Het2	mas17	GY	AA	0.415025	17
Het2	mas17	GY	A	0.448834	18
Het2	mas17	GY	A_Inb	0.441009	18
Het2	mas17	GY	AD	0.457036	18
Het2	mas17	GY	AD_Inb	0.448812	18
Het2	mas17	GY	ADI_Inb	0.440236	18
Het2	mas17	GY	AA	0.369773	18
Het2	mas17	GY	A	0.487648	19
Het2	mas17	GY	A_Inb	0.485381	19
Het2	mas17	GY	AD	0.471654	19
Het2	mas17	GY	AD_Inb	0.468451	19
Het2	mas17	GY	ADI_Inb	0.469198	19
Het2	mas17	GY	AA	0.402541	19
Het2	mas17	GY	A	0.461139	20
Het2	mas17	GY	A_Inb	0.454691	20
Het2	mas17	GY	AD	0.464943	20
Het2	mas17	GY	AD_Inb	0.451534	20
Het2	mas17	GY	ADI_Inb	0.451414	20
Het2	mas17	GY	AA	0.387217	20
Het2	mas17	GY	A	0.471017	21
Het2	mas17	GY	A_Inb	0.474438	21
Het2	mas17	GY	AD	0.456827	21
Het2	mas17	GY	AD_Inb	0.460948	21
Het2	mas17	GY	ADI_Inb	0.462009	21
Het2	mas17	GY	AA	0.410817	21
Het2	mas17	GY	A	0.43927	22
Het2	mas17	GY	A_Inb	0.447322	22
Het2	mas17	GY	AD	0.441735	22
Het2	mas17	GY	AD_Inb	0.445964	22
Het2	mas17	GY	ADI_Inb	0.443866	22
Het2	mas17	GY	AA	0.396745	22
Het2	mas17	GY	A	0.458843	23
Het2	mas17	GY	A_Inb	0.442635	23
Het2	mas17	GY	AD	0.451044	23
Het2	mas17	GY	AD_Inb	0.434472	23
Het2	mas17	GY	ADI_Inb	0.431446	23
Het2	mas17	GY	AA	0.378419	23
Het2	mas17	GY	A	0.47721	24
Het2	mas17	GY	A_Inb	0.486897	24
Het2	mas17	GY	AD	0.475464	24
Het2	mas17	GY	AD_Inb	0.482122	24
Het2	mas17	GY	ADI_Inb	0.478269	24
Het2	mas17	GY	AA	0.40779	24
Het2	mas17	GY	A	0.475716	25
Het2	mas17	GY	A_Inb	0.479523	25
Het2	mas17	GY	AD	0.470331	25
Het2	mas17	GY	AD_Inb	0.47225	25
Het2	mas17	GY	ADI_Inb	0.467791	25
Het2	mas17	GY	AA	0.400367	25
Het2	mas17	GY	A	0.511046	26
Het2	mas17	GY	A_Inb	0.515471	26
Het2	mas17	GY	AD	0.516368	26
Het2	mas17	GY	AD_Inb	0.517585	26
Het2	mas17	GY	ADI_Inb	0.511514	26
Het2	mas17	GY	AA	0.434491	26
Het2	mas17	GY	A	0.469681	27
Het2	mas17	GY	A_Inb	0.458761	27
Het2	mas17	GY	AD	0.478054	27
Het2	mas17	GY	AD_Inb	0.462104	27
Het2	mas17	GY	ADI_Inb	0.457761	27
Het2	mas17	GY	AA	0.385506	27
Het2	mas17	GY	A	0.540963	28
Het2	mas17	GY	A_Inb	0.547166	28
Het2	mas17	GY	AD	0.531413	28
Het2	mas17	GY	AD_Inb	0.535228	28
Het2	mas17	GY	ADI_Inb	0.53518	28
Het2	mas17	GY	AA	0.474646	28
Het2	mas17	GY	A	0.463619	29
Het2	mas17	GY	A_Inb	0.46411	29
Het2	mas17	GY	AD	0.464047	29
Het2	mas17	GY	AD_Inb	0.462232	29
Het2	mas17	GY	ADI_Inb	0.454276	29
Het2	mas17	GY	AA	0.37759	29
Het2	mas17	GY	A	0.48783	30
Het2	mas17	GY	A_Inb	0.484692	30
Het2	mas17	GY	AD	0.476436	30
Het2	mas17	GY	AD_Inb	0.470397	30
Het2	mas17	GY	ADI_Inb	0.471312	30
Het2	mas17	GY	AA	0.384304	30
Het2	mas17	GY	A	0.438429	31
Het2	mas17	GY	A_Inb	0.440386	31
Het2	mas17	GY	AD	0.446587	31
Het2	mas17	GY	AD_Inb	0.441396	31
Het2	mas17	GY	ADI_Inb	0.432778	31
Het2	mas17	GY	AA	0.356549	31
Het2	mas17	GY	A	0.5011	32
Het2	mas17	GY	A_Inb	0.502454	32
Het2	mas17	GY	AD	0.496309	32
Het2	mas17	GY	AD_Inb	0.494017	32
Het2	mas17	GY	ADI_Inb	0.494748	32
Het2	mas17	GY	AA	0.443365	32
Het2	mas17	GY	A	0.467829	33
Het2	mas17	GY	A_Inb	0.471176	33
Het2	mas17	GY	AD	0.460001	33
Het2	mas17	GY	AD_Inb	0.460551	33
Het2	mas17	GY	ADI_Inb	0.460282	33
Het2	mas17	GY	AA	0.407245	33
Het2	mas17	GY	A	0.454642	34
Het2	mas17	GY	A_Inb	0.452411	34
Het2	mas17	GY	AD	0.455238	34
Het2	mas17	GY	AD_Inb	0.449269	34
Het2	mas17	GY	ADI_Inb	0.444366	34
Het2	mas17	GY	AA	0.383793	34
Het2	mas17	GY	A	0.442423	35
Het2	mas17	GY	A_Inb	0.437471	35
Het2	mas17	GY	AD	0.438754	35
Het2	mas17	GY	AD_Inb	0.433199	35
Het2	mas17	GY	ADI_Inb	0.429723	35
Het2	mas17	GY	AA	0.346901	35
Het2	mas17	GY	A	0.46854	36
Het2	mas17	GY	A_Inb	0.478864	36
Het2	mas17	GY	AD	0.475742	36
Het2	mas17	GY	AD_Inb	0.483477	36
Het2	mas17	GY	ADI_Inb	0.476162	36
Het2	mas17	GY	AA	0.394404	36
Het2	mas17	GY	A	0.403862	37
Het2	mas17	GY	A_Inb	0.395747	37
Het2	mas17	GY	AD	0.409326	37
Het2	mas17	GY	AD_Inb	0.395225	37
Het2	mas17	GY	ADI_Inb	0.391679	37
Het2	mas17	GY	AA	0.316303	37
Het2	mas17	GY	A	0.507206	38
Het2	mas17	GY	A_Inb	0.503003	38
Het2	mas17	GY	AD	0.500687	38
Het2	mas17	GY	AD_Inb	0.497465	38
Het2	mas17	GY	ADI_Inb	0.494682	38
Het2	mas17	GY	AA	0.394359	38
Het2	mas17	GY	A	0.427019	39
Het2	mas17	GY	A_Inb	0.428851	39
Het2	mas17	GY	AD	0.425068	39
Het2	mas17	GY	AD_Inb	0.424025	39
Het2	mas17	GY	ADI_Inb	0.418374	39
Het2	mas17	GY	AA	0.371115	39
Het2	mas17	GY	A	0.467973	40
Het2	mas17	GY	A_Inb	0.462556	40
Het2	mas17	GY	AD	0.462488	40
Het2	mas17	GY	AD_Inb	0.451987	40
Het2	mas17	GY	ADI_Inb	0.441812	40
Het2	mas17	GY	AA	0.369208	40
Het2	mas17	GY	A	0.475344	41
Het2	mas17	GY	A_Inb	0.483683	41
Het2	mas17	GY	AD	0.477059	41
Het2	mas17	GY	AD_Inb	0.47986	41
Het2	mas17	GY	ADI_Inb	0.478125	41
Het2	mas17	GY	AA	0.380553	41
Het2	mas17	GY	A	0.483069	42
Het2	mas17	GY	A_Inb	0.484912	42
Het2	mas17	GY	AD	0.483526	42
Het2	mas17	GY	AD_Inb	0.480976	42
Het2	mas17	GY	ADI_Inb	0.47305	42
Het2	mas17	GY	AA	0.39632	42
Het2	mas17	GY	A	0.507442	43
Het2	mas17	GY	A_Inb	0.503092	43
Het2	mas17	GY	AD	0.504655	43
Het2	mas17	GY	AD_Inb	0.4953	43
Het2	mas17	GY	ADI_Inb	0.496348	43
Het2	mas17	GY	AA	0.430045	43
Het2	mas17	GY	A	0.489914	44
Het2	mas17	GY	A_Inb	0.485705	44
Het2	mas17	GY	AD	0.482288	44
Het2	mas17	GY	AD_Inb	0.477643	44
Het2	mas17	GY	ADI_Inb	0.474397	44
Het2	mas17	GY	AA	0.421849	44
Het2	mas17	GY	A	0.482745	45
Het2	mas17	GY	A_Inb	0.489615	45
Het2	mas17	GY	AD	0.481066	45
Het2	mas17	GY	AD_Inb	0.483562	45
Het2	mas17	GY	ADI_Inb	0.476842	45
Het2	mas17	GY	AA	0.403735	45
Het2	mas17	GY	A	0.46372	46
Het2	mas17	GY	A_Inb	0.439443	46
Het2	mas17	GY	AD	0.450509	46
Het2	mas17	GY	AD_Inb	0.425781	46
Het2	mas17	GY	ADI_Inb	0.426225	46
Het2	mas17	GY	AA	0.36372	46
Het2	mas17	GY	A	0.466387	47
Het2	mas17	GY	A_Inb	0.465306	47
Het2	mas17	GY	AD	0.472112	47
Het2	mas17	GY	AD_Inb	0.464331	47
Het2	mas17	GY	ADI_Inb	0.459506	47
Het2	mas17	GY	AA	0.367352	47
Het2	mas17	GY	A	0.469354	48
Het2	mas17	GY	A_Inb	0.470598	48
Het2	mas17	GY	AD	0.459947	48
Het2	mas17	GY	AD_Inb	0.459504	48
Het2	mas17	GY	ADI_Inb	0.454776	48
Het2	mas17	GY	AA	0.388596	48
Het2	mas17	GY	A	0.4381	49
Het2	mas17	GY	A_Inb	0.441095	49
Het2	mas17	GY	AD	0.439861	49
Het2	mas17	GY	AD_Inb	0.441093	49
Het2	mas17	GY	ADI_Inb	0.438352	49
Het2	mas17	GY	AA	0.369806	49
Het2	mas17	GY	A	0.439256	50
Het2	mas17	GY	A_Inb	0.43195	50
Het2	mas17	GY	AD	0.435952	50
Het2	mas17	GY	AD_Inb	0.424333	50
Het2	mas17	GY	ADI_Inb	0.421888	50
Het2	mas17	GY	AA	0.333633	50
Het2	mas17	GY	A	0.442338	51
Het2	mas17	GY	A_Inb	0.453141	51
Het2	mas17	GY	AD	0.429097	51
Het2	mas17	GY	AD_Inb	0.436662	51
Het2	mas17	GY	ADI_Inb	0.43331	51
Het2	mas17	GY	AA	0.362962	51
Het2	mas17	GY	A	0.512608	52
Het2	mas17	GY	A_Inb	0.509067	52
Het2	mas17	GY	AD	0.510226	52
Het2	mas17	GY	AD_Inb	0.504451	52
Het2	mas17	GY	ADI_Inb	0.498898	52
Het2	mas17	GY	AA	0.406174	52
Het2	mas17	GY	A	0.462675	53
Het2	mas17	GY	A_Inb	0.460458	53
Het2	mas17	GY	AD	0.455778	53
Het2	mas17	GY	AD_Inb	0.454025	53
Het2	mas17	GY	ADI_Inb	0.450008	53
Het2	mas17	GY	AA	0.374176	53
Het2	mas17	GY	A	0.424646	54
Het2	mas17	GY	A_Inb	0.428487	54
Het2	mas17	GY	AD	0.431147	54
Het2	mas17	GY	AD_Inb	0.431796	54
Het2	mas17	GY	ADI_Inb	0.427986	54
Het2	mas17	GY	AA	0.33531	54
Het2	mas17	GY	A	0.509079	55
Het2	mas17	GY	A_Inb	0.501505	55
Het2	mas17	GY	AD	0.498461	55
Het2	mas17	GY	AD_Inb	0.486113	55
Het2	mas17	GY	ADI_Inb	0.485538	55
Het2	mas17	GY	AA	0.408128	55
Het2	mas17	GY	A	0.451406	56
Het2	mas17	GY	A_Inb	0.459281	56
Het2	mas17	GY	AD	0.450849	56
Het2	mas17	GY	AD_Inb	0.455119	56
Het2	mas17	GY	ADI_Inb	0.45353	56
Het2	mas17	GY	AA	0.387441	56
Het2	mas17	GY	A	0.424626	57
Het2	mas17	GY	A_Inb	0.429481	57
Het2	mas17	GY	AD	0.412406	57
Het2	mas17	GY	AD_Inb	0.416796	57
Het2	mas17	GY	ADI_Inb	0.415209	57
Het2	mas17	GY	AA	0.328491	57
Het2	mas17	GY	A	0.407887	58
Het2	mas17	GY	A_Inb	0.406179	58
Het2	mas17	GY	AD	0.415094	58
Het2	mas17	GY	AD_Inb	0.411754	58
Het2	mas17	GY	ADI_Inb	0.401684	58
Het2	mas17	GY	AA	0.335025	58
Het2	mas17	GY	A	0.433367	59
Het2	mas17	GY	A_Inb	0.429476	59
Het2	mas17	GY	AD	0.430638	59
Het2	mas17	GY	AD_Inb	0.419538	59
Het2	mas17	GY	ADI_Inb	0.417195	59
Het2	mas17	GY	AA	0.324064	59
Het2	mas17	GY	A	0.413276	60
Het2	mas17	GY	A_Inb	0.41867	60
Het2	mas17	GY	AD	0.406447	60
Het2	mas17	GY	AD_Inb	0.411707	60
Het2	mas17	GY	ADI_Inb	0.409651	60
Het2	mas17	GY	AA	0.311782	60
Het2	mas17	GY	A	0.508494	61
Het2	mas17	GY	A_Inb	0.515999	61
Het2	mas17	GY	AD	0.505184	61
Het2	mas17	GY	AD_Inb	0.5079	61
Het2	mas17	GY	ADI_Inb	0.503347	61
Het2	mas17	GY	AA	0.413197	61
Het2	mas17	GY	A	0.455438	62
Het2	mas17	GY	A_Inb	0.441952	62
Het2	mas17	GY	AD	0.455993	62
Het2	mas17	GY	AD_Inb	0.435784	62
Het2	mas17	GY	ADI_Inb	0.425641	62
Het2	mas17	GY	AA	0.38533	62
Het2	mas17	GY	A	0.470682	63
Het2	mas17	GY	A_Inb	0.475638	63
Het2	mas17	GY	AD	0.46145	63
Het2	mas17	GY	AD_Inb	0.464932	63
Het2	mas17	GY	ADI_Inb	0.46282	63
Het2	mas17	GY	AA	0.414877	63
Het2	mas17	GY	A	0.461869	64
Het2	mas17	GY	A_Inb	0.464896	64
Het2	mas17	GY	AD	0.462374	64
Het2	mas17	GY	AD_Inb	0.460919	64
Het2	mas17	GY	ADI_Inb	0.461523	64
Het2	mas17	GY	AA	0.409321	64
Het2	mas17	GY	A	0.457737	65
Het2	mas17	GY	A_Inb	0.469301	65
Het2	mas17	GY	AD	0.457256	65
Het2	mas17	GY	AD_Inb	0.465828	65
Het2	mas17	GY	ADI_Inb	0.463913	65
Het2	mas17	GY	AA	0.4048	65
Het2	mas17	GY	A	0.484444	66
Het2	mas17	GY	A_Inb	0.468303	66
Het2	mas17	GY	AD	0.480019	66
Het2	mas17	GY	AD_Inb	0.463246	66
Het2	mas17	GY	ADI_Inb	0.463035	66
Het2	mas17	GY	AA	0.406243	66
Het2	mas17	GY	A	0.470368	67
Het2	mas17	GY	A_Inb	0.451762	67
Het2	mas17	GY	AD	0.463438	67
Het2	mas17	GY	AD_Inb	0.438277	67
Het2	mas17	GY	ADI_Inb	0.434296	67
Het2	mas17	GY	AA	0.409088	67
Het2	mas17	GY	A	0.480475	68
Het2	mas17	GY	A_Inb	0.489845	68
Het2	mas17	GY	AD	0.482768	68
Het2	mas17	GY	AD_Inb	0.486452	68
Het2	mas17	GY	ADI_Inb	0.480018	68
Het2	mas17	GY	AA	0.411582	68
Het2	mas17	GY	A	0.440338	69
Het2	mas17	GY	A_Inb	0.440763	69
Het2	mas17	GY	AD	0.439206	69
Het2	mas17	GY	AD_Inb	0.438029	69
Het2	mas17	GY	ADI_Inb	0.433782	69
Het2	mas17	GY	AA	0.34112	69
Het2	mas17	GY	A	0.506312	70
Het2	mas17	GY	A_Inb	0.489554	70
Het2	mas17	GY	AD	0.500913	70
Het2	mas17	GY	AD_Inb	0.480218	70
Het2	mas17	GY	ADI_Inb	0.481095	70
Het2	mas17	GY	AA	0.416429	70
Het2	mas17	GY	A	0.496225	71
Het2	mas17	GY	A_Inb	0.497757	71
Het2	mas17	GY	AD	0.500979	71
Het2	mas17	GY	AD_Inb	0.500321	71
Het2	mas17	GY	ADI_Inb	0.495764	71
Het2	mas17	GY	AA	0.393068	71
Het2	mas17	GY	A	0.497994	72
Het2	mas17	GY	A_Inb	0.496872	72
Het2	mas17	GY	AD	0.497399	72
Het2	mas17	GY	AD_Inb	0.493132	72
Het2	mas17	GY	ADI_Inb	0.490324	72
Het2	mas17	GY	AA	0.431891	72
Het2	mas17	GY	A	0.474809	73
Het2	mas17	GY	A_Inb	0.468219	73
Het2	mas17	GY	AD	0.475702	73
Het2	mas17	GY	AD_Inb	0.468269	73
Het2	mas17	GY	ADI_Inb	0.464689	73
Het2	mas17	GY	AA	0.387287	73
Het2	mas17	GY	A	0.47579	74
Het2	mas17	GY	A_Inb	0.473757	74
Het2	mas17	GY	AD	0.47301	74
Het2	mas17	GY	AD_Inb	0.467354	74
Het2	mas17	GY	ADI_Inb	0.464443	74
Het2	mas17	GY	AA	0.432065	74
Het2	mas17	GY	A	0.471689	75
Het2	mas17	GY	A_Inb	0.475019	75
Het2	mas17	GY	AD	0.481281	75
Het2	mas17	GY	AD_Inb	0.48069	75
Het2	mas17	GY	ADI_Inb	0.478836	75
Het2	mas17	GY	AA	0.428002	75
Het2	mas17	GY	A	0.453315	76
Het2	mas17	GY	A_Inb	0.456566	76
Het2	mas17	GY	AD	0.462233	76
Het2	mas17	GY	AD_Inb	0.462746	76
Het2	mas17	GY	ADI_Inb	0.458818	76
Het2	mas17	GY	AA	0.371962	76
Het2	mas17	GY	A	0.449817	77
Het2	mas17	GY	A_Inb	0.45005	77
Het2	mas17	GY	AD	0.46131	77
Het2	mas17	GY	AD_Inb	0.460446	77
Het2	mas17	GY	ADI_Inb	0.452687	77
Het2	mas17	GY	AA	0.359609	77
Het2	mas17	GY	A	0.505675	78
Het2	mas17	GY	A_Inb	0.510222	78
Het2	mas17	GY	AD	0.491521	78
Het2	mas17	GY	AD_Inb	0.494436	78
Het2	mas17	GY	ADI_Inb	0.495598	78
Het2	mas17	GY	AA	0.445382	78
Het2	mas17	GY	A	0.493415	79
Het2	mas17	GY	A_Inb	0.497105	79
Het2	mas17	GY	AD	0.485645	79
Het2	mas17	GY	AD_Inb	0.487142	79
Het2	mas17	GY	ADI_Inb	0.485637	79
Het2	mas17	GY	AA	0.421303	79
Het2	mas17	GY	A	0.442328	80
Het2	mas17	GY	A_Inb	0.448337	80
Het2	mas17	GY	AD	0.446936	80
Het2	mas17	GY	AD_Inb	0.450684	80
Het2	mas17	GY	ADI_Inb	0.443936	80
Het2	mas17	GY	AA	0.330748	80
Het2	mas17	GY	A	0.480366	81
Het2	mas17	GY	A_Inb	0.488215	81
Het2	mas17	GY	AD	0.477818	81
Het2	mas17	GY	AD_Inb	0.48056	81
Het2	mas17	GY	ADI_Inb	0.474584	81
Het2	mas17	GY	AA	0.380217	81
Het2	mas17	GY	A	0.458607	82
Het2	mas17	GY	A_Inb	0.452593	82
Het2	mas17	GY	AD	0.457842	82
Het2	mas17	GY	AD_Inb	0.449818	82
Het2	mas17	GY	ADI_Inb	0.448733	82
Het2	mas17	GY	AA	0.369779	82
Het2	mas17	GY	A	0.506757	83
Het2	mas17	GY	A_Inb	0.511136	83
Het2	mas17	GY	AD	0.505129	83
Het2	mas17	GY	AD_Inb	0.507949	83
Het2	mas17	GY	ADI_Inb	0.506536	83
Het2	mas17	GY	AA	0.405994	83
Het2	mas17	GY	A	0.437488	84
Het2	mas17	GY	A_Inb	0.450636	84
Het2	mas17	GY	AD	0.430894	84
Het2	mas17	GY	AD_Inb	0.440729	84
Het2	mas17	GY	ADI_Inb	0.437639	84
Het2	mas17	GY	AA	0.369294	84
Het2	mas17	GY	A	0.430141	85
Het2	mas17	GY	A_Inb	0.430164	85
Het2	mas17	GY	AD	0.438008	85
Het2	mas17	GY	AD_Inb	0.429923	85
Het2	mas17	GY	ADI_Inb	0.42722	85
Het2	mas17	GY	AA	0.296745	85
Het2	mas17	GY	A	0.477941	86
Het2	mas17	GY	A_Inb	0.476488	86
Het2	mas17	GY	AD	0.476466	86
Het2	mas17	GY	AD_Inb	0.471568	86
Het2	mas17	GY	ADI_Inb	0.469002	86
Het2	mas17	GY	AA	0.432137	86
Het2	mas17	GY	A	0.501666	87
Het2	mas17	GY	A_Inb	0.507272	87
Het2	mas17	GY	AD	0.497348	87
Het2	mas17	GY	AD_Inb	0.503674	87
Het2	mas17	GY	ADI_Inb	0.501436	87
Het2	mas17	GY	AA	0.444702	87
Het2	mas17	GY	A	0.490896	88
Het2	mas17	GY	A_Inb	0.501468	88
Het2	mas17	GY	AD	0.47826	88
Het2	mas17	GY	AD_Inb	0.48584	88
Het2	mas17	GY	ADI_Inb	0.486014	88
Het2	mas17	GY	AA	0.404685	88
Het2	mas17	GY	A	0.490891	89
Het2	mas17	GY	A_Inb	0.493158	89
Het2	mas17	GY	AD	0.493584	89
Het2	mas17	GY	AD_Inb	0.493144	89
Het2	mas17	GY	ADI_Inb	0.491279	89
Het2	mas17	GY	AA	0.399283	89
Het2	mas17	GY	A	0.460436	90
Het2	mas17	GY	A_Inb	0.461032	90
Het2	mas17	GY	AD	0.474247	90
Het2	mas17	GY	AD_Inb	0.470816	90
Het2	mas17	GY	ADI_Inb	0.463549	90
Het2	mas17	GY	AA	0.357779	90
Het2	mas17	GY	A	0.41617	91
Het2	mas17	GY	A_Inb	0.424705	91
Het2	mas17	GY	AD	0.401257	91
Het2	mas17	GY	AD_Inb	0.40999	91
Het2	mas17	GY	ADI_Inb	0.411788	91
Het2	mas17	GY	AA	0.365002	91
Het2	mas17	GY	A	0.450756	92
Het2	mas17	GY	A_Inb	0.453144	92
Het2	mas17	GY	AD	0.448788	92
Het2	mas17	GY	AD_Inb	0.448854	92
Het2	mas17	GY	ADI_Inb	0.445148	92
Het2	mas17	GY	AA	0.367998	92
Het2	mas17	GY	A	0.500193	93
Het2	mas17	GY	A_Inb	0.48753	93
Het2	mas17	GY	AD	0.497225	93
Het2	mas17	GY	AD_Inb	0.481336	93
Het2	mas17	GY	ADI_Inb	0.478948	93
Het2	mas17	GY	AA	0.397914	93
Het2	mas17	GY	A	0.460998	94
Het2	mas17	GY	A_Inb	0.470457	94
Het2	mas17	GY	AD	0.449693	94
Het2	mas17	GY	AD_Inb	0.455229	94
Het2	mas17	GY	ADI_Inb	0.453507	94
Het2	mas17	GY	AA	0.388652	94
Het2	mas17	GY	A	0.469248	95
Het2	mas17	GY	A_Inb	0.468204	95
Het2	mas17	GY	AD	0.466201	95
Het2	mas17	GY	AD_Inb	0.462486	95
Het2	mas17	GY	ADI_Inb	0.45892	95
Het2	mas17	GY	AA	0.412168	95
Het2	mas17	GY	A	0.465885	96
Het2	mas17	GY	A_Inb	0.460412	96
Het2	mas17	GY	AD	0.478659	96
Het2	mas17	GY	AD_Inb	0.467165	96
Het2	mas17	GY	ADI_Inb	0.462657	96
Het2	mas17	GY	AA	0.386774	96
Het2	mas17	GY	A	0.479354	97
Het2	mas17	GY	A_Inb	0.478516	97
Het2	mas17	GY	AD	0.468342	97
Het2	mas17	GY	AD_Inb	0.464697	97
Het2	mas17	GY	ADI_Inb	0.462023	97
Het2	mas17	GY	AA	0.381467	97
Het2	mas17	GY	A	0.485319	98
Het2	mas17	GY	A_Inb	0.478494	98
Het2	mas17	GY	AD	0.472828	98
Het2	mas17	GY	AD_Inb	0.464804	98
Het2	mas17	GY	ADI_Inb	0.46434	98
Het2	mas17	GY	AA	0.3952	98
Het2	mas17	GY	A	0.408016	99
Het2	mas17	GY	A_Inb	0.405993	99
Het2	mas17	GY	AD	0.405005	99
Het2	mas17	GY	AD_Inb	0.40108	99
Het2	mas17	GY	ADI_Inb	0.399161	99
Het2	mas17	GY	AA	0.330688	99
Het2	mas17	GY	A	0.510244	100
Het2	mas17	GY	A_Inb	0.507087	100
Het2	mas17	GY	AD	0.506076	100
Het2	mas17	GY	AD_Inb	0.501173	100
Het2	mas17	GY	ADI_Inb	0.496231	100
Het2	mas17	GY	AA	0.451964	100
Het2	smh16	GY	A	0.372444	1
Het2	smh16	GY	A_Inb	0.392245	1
Het2	smh16	GY	AD	0.395729	1
Het2	smh16	GY	AD_Inb	0.398835	1
Het2	smh16	GY	ADI_Inb	0.398257	1
Het2	smh16	GY	AA	0.300491	1
Het2	smh16	GY	A	0.422898	2
Het2	smh16	GY	A_Inb	0.422637	2
Het2	smh16	GY	AD	0.451708	2
Het2	smh16	GY	AD_Inb	0.431121	2
Het2	smh16	GY	ADI_Inb	0.430643	2
Het2	smh16	GY	AA	0.378318	2
Het2	smh16	GY	A	0.407803	3
Het2	smh16	GY	A_Inb	0.412141	3
Het2	smh16	GY	AD	0.43346	3
Het2	smh16	GY	AD_Inb	0.423476	3
Het2	smh16	GY	ADI_Inb	0.423083	3
Het2	smh16	GY	AA	0.381826	3
Het2	smh16	GY	A	0.397322	4
Het2	smh16	GY	A_Inb	0.420218	4
Het2	smh16	GY	AD	0.418745	4
Het2	smh16	GY	AD_Inb	0.429273	4
Het2	smh16	GY	ADI_Inb	0.429102	4
Het2	smh16	GY	AA	0.35728	4
Het2	smh16	GY	A	0.389794	5
Het2	smh16	GY	A_Inb	0.400681	5
Het2	smh16	GY	AD	0.419914	5
Het2	smh16	GY	AD_Inb	0.416001	5
Het2	smh16	GY	ADI_Inb	0.415174	5
Het2	smh16	GY	AA	0.314565	5
Het2	smh16	GY	A	0.348381	6
Het2	smh16	GY	A_Inb	0.356088	6
Het2	smh16	GY	AD	0.386507	6
Het2	smh16	GY	AD_Inb	0.374794	6
Het2	smh16	GY	ADI_Inb	0.372958	6
Het2	smh16	GY	AA	0.310854	6
Het2	smh16	GY	A	0.33319	7
Het2	smh16	GY	A_Inb	0.350977	7
Het2	smh16	GY	AD	0.371397	7
Het2	smh16	GY	AD_Inb	0.370977	7
Het2	smh16	GY	ADI_Inb	0.370365	7
Het2	smh16	GY	AA	0.319834	7
Het2	smh16	GY	A	0.381731	8
Het2	smh16	GY	A_Inb	0.399774	8
Het2	smh16	GY	AD	0.418869	8
Het2	smh16	GY	AD_Inb	0.413158	8
Het2	smh16	GY	ADI_Inb	0.411058	8
Het2	smh16	GY	AA	0.255426	8
Het2	smh16	GY	A	0.408141	9
Het2	smh16	GY	A_Inb	0.423253	9
Het2	smh16	GY	AD	0.445328	9
Het2	smh16	GY	AD_Inb	0.437404	9
Het2	smh16	GY	ADI_Inb	0.435585	9
Het2	smh16	GY	AA	0.376476	9
Het2	smh16	GY	A	0.385001	10
Het2	smh16	GY	A_Inb	0.395825	10
Het2	smh16	GY	AD	0.403301	10
Het2	smh16	GY	AD_Inb	0.401918	10
Het2	smh16	GY	ADI_Inb	0.401741	10
Het2	smh16	GY	AA	0.375138	10
Het2	smh16	GY	A	0.326893	11
Het2	smh16	GY	A_Inb	0.344908	11
Het2	smh16	GY	AD	0.362919	11
Het2	smh16	GY	AD_Inb	0.361039	11
Het2	smh16	GY	ADI_Inb	0.35772	11
Het2	smh16	GY	AA	0.286298	11
Het2	smh16	GY	A	0.377898	12
Het2	smh16	GY	A_Inb	0.378623	12
Het2	smh16	GY	AD	0.414039	12
Het2	smh16	GY	AD_Inb	0.396995	12
Het2	smh16	GY	ADI_Inb	0.396034	12
Het2	smh16	GY	AA	0.329051	12
Het2	smh16	GY	A	0.393974	13
Het2	smh16	GY	A_Inb	0.390793	13
Het2	smh16	GY	AD	0.428863	13
Het2	smh16	GY	AD_Inb	0.406878	13
Het2	smh16	GY	ADI_Inb	0.40602	13
Het2	smh16	GY	AA	0.32321	13
Het2	smh16	GY	A	0.379826	14
Het2	smh16	GY	A_Inb	0.395133	14
Het2	smh16	GY	AD	0.395641	14
Het2	smh16	GY	AD_Inb	0.391142	14
Het2	smh16	GY	ADI_Inb	0.391302	14
Het2	smh16	GY	AA	0.332938	14
Het2	smh16	GY	A	0.389493	15
Het2	smh16	GY	A_Inb	0.407059	15
Het2	smh16	GY	AD	0.414239	15
Het2	smh16	GY	AD_Inb	0.4157	15
Het2	smh16	GY	ADI_Inb	0.413771	15
Het2	smh16	GY	AA	0.339727	15
Het2	smh16	GY	A	0.394907	16
Het2	smh16	GY	A_Inb	0.406582	16
Het2	smh16	GY	AD	0.425237	16
Het2	smh16	GY	AD_Inb	0.41734	16
Het2	smh16	GY	ADI_Inb	0.41651	16
Het2	smh16	GY	AA	0.331594	16
Het2	smh16	GY	A	0.378885	17
Het2	smh16	GY	A_Inb	0.393179	17
Het2	smh16	GY	AD	0.410561	17
Het2	smh16	GY	AD_Inb	0.406102	17
Het2	smh16	GY	ADI_Inb	0.405153	17
Het2	smh16	GY	AA	0.371266	17
Het2	smh16	GY	A	0.350824	18
Het2	smh16	GY	A_Inb	0.345187	18
Het2	smh16	GY	AD	0.376899	18
Het2	smh16	GY	AD_Inb	0.352569	18
Het2	smh16	GY	ADI_Inb	0.347747	18
Het2	smh16	GY	AA	0.304635	18
Het2	smh16	GY	A	0.3694	19
Het2	smh16	GY	A_Inb	0.368147	19
Het2	smh16	GY	AD	0.385239	19
Het2	smh16	GY	AD_Inb	0.374934	19
Het2	smh16	GY	ADI_Inb	0.374685	19
Het2	smh16	GY	AA	0.304732	19
Het2	smh16	GY	A	0.366323	20
Het2	smh16	GY	A_Inb	0.385199	20
Het2	smh16	GY	AD	0.398701	20
Het2	smh16	GY	AD_Inb	0.399277	20
Het2	smh16	GY	ADI_Inb	0.398228	20
Het2	smh16	GY	AA	0.312216	20
Het2	smh16	GY	A	0.327363	21
Het2	smh16	GY	A_Inb	0.352505	21
Het2	smh16	GY	AD	0.364759	21
Het2	smh16	GY	AD_Inb	0.372508	21
Het2	smh16	GY	ADI_Inb	0.372211	21
Het2	smh16	GY	AA	0.254982	21
Het2	smh16	GY	A	0.364071	22
Het2	smh16	GY	A_Inb	0.380395	22
Het2	smh16	GY	AD	0.395497	22
Het2	smh16	GY	AD_Inb	0.395951	22
Het2	smh16	GY	ADI_Inb	0.39392	22
Het2	smh16	GY	AA	0.303772	22
Het2	smh16	GY	A	0.37411	23
Het2	smh16	GY	A_Inb	0.410032	23
Het2	smh16	GY	AD	0.401007	23
Het2	smh16	GY	AD_Inb	0.419118	23
Het2	smh16	GY	ADI_Inb	0.418028	23
Het2	smh16	GY	AA	0.328714	23
Het2	smh16	GY	A	0.306352	24
Het2	smh16	GY	A_Inb	0.325885	24
Het2	smh16	GY	AD	0.338792	24
Het2	smh16	GY	AD_Inb	0.341083	24
Het2	smh16	GY	ADI_Inb	0.340079	24
Het2	smh16	GY	AA	0.264155	24
Het2	smh16	GY	A	0.32211	25
Het2	smh16	GY	A_Inb	0.338022	25
Het2	smh16	GY	AD	0.346309	25
Het2	smh16	GY	AD_Inb	0.348723	25
Het2	smh16	GY	ADI_Inb	0.348562	25
Het2	smh16	GY	AA	0.273046	25
Het2	smh16	GY	A	0.415037	26
Het2	smh16	GY	A_Inb	0.426749	26
Het2	smh16	GY	AD	0.451335	26
Het2	smh16	GY	AD_Inb	0.440923	26
Het2	smh16	GY	ADI_Inb	0.438414	26
Het2	smh16	GY	AA	0.381689	26
Het2	smh16	GY	A	0.327646	27
Het2	smh16	GY	A_Inb	0.350131	27
Het2	smh16	GY	AD	0.359919	27
Het2	smh16	GY	AD_Inb	0.365517	27
Het2	smh16	GY	ADI_Inb	0.365216	27
Het2	smh16	GY	AA	0.291193	27
Het2	smh16	GY	A	0.358043	28
Het2	smh16	GY	A_Inb	0.37583	28
Het2	smh16	GY	AD	0.379408	28
Het2	smh16	GY	AD_Inb	0.378143	28
Het2	smh16	GY	ADI_Inb	0.378333	28
Het2	smh16	GY	AA	0.29906	28
Het2	smh16	GY	A	0.379093	29
Het2	smh16	GY	A_Inb	0.401287	29
Het2	smh16	GY	AD	0.416115	29
Het2	smh16	GY	AD_Inb	0.416092	29
Het2	smh16	GY	ADI_Inb	0.413912	29
Het2	smh16	GY	AA	0.306403	29
Het2	smh16	GY	A	0.308806	30
Het2	smh16	GY	A_Inb	0.322652	30
Het2	smh16	GY	AD	0.336582	30
Het2	smh16	GY	AD_Inb	0.337373	30
Het2	smh16	GY	ADI_Inb	0.336226	30
Het2	smh16	GY	AA	0.262715	30
Het2	smh16	GY	A	0.33416	31
Het2	smh16	GY	A_Inb	0.353899	31
Het2	smh16	GY	AD	0.363293	31
Het2	smh16	GY	AD_Inb	0.368711	31
Het2	smh16	GY	ADI_Inb	0.367941	31
Het2	smh16	GY	AA	0.296699	31
Het2	smh16	GY	A	0.328941	32
Het2	smh16	GY	A_Inb	0.343763	32
Het2	smh16	GY	AD	0.36542	32
Het2	smh16	GY	AD_Inb	0.360709	32
Het2	smh16	GY	ADI_Inb	0.360222	32
Het2	smh16	GY	AA	0.290536	32
Het2	smh16	GY	A	0.376044	33
Het2	smh16	GY	A_Inb	0.390839	33
Het2	smh16	GY	AD	0.416502	33
Het2	smh16	GY	AD_Inb	0.408428	33
Het2	smh16	GY	ADI_Inb	0.398431	33
Het2	smh16	GY	AA	0.323575	33
[truncated: 17,202 more rows]
